# Supplementary material for: Synthesis of 1-(2-Fluorophenyl)pyrazoles by 1,3-Dipolar Cycloaddition of the Corresponding Sydnones
Source: MDPI journal article supplement (doi:10.3390/molecules26123693), 2021-06-17

# *Supporting Information*

## **Synthesis of 1-(2-fluorophenyl)pyrazoles by 1,3-dipolar cycloaddition of the corresponding sydnone**

**Denisa Dumitrescu<sup>1</sup>, Sergiu Shova<sup>2,3</sup>, Constantin Draghici<sup>4</sup>, Marcel Mirel Popa<sup>4\*</sup>, and Florea Dumitrascu<sup>4\*</sup>**

- 1 Ovidius University Constanta, Faculty of Pharmacy, Str. Cpt. Av. Al. Serbanescu, Campus Corp C, Constanta 900470, Romania
- 2 Ningbo University of Technology, No.55-155 Cui Bai Road, Ningbo City, Zhejiang, 315016, China
- 3 "Petru Poni" Institute for Macromolecular Chemistry, Romanian Academy, Department of inorganic polymers, Aleea Grigore Ghica Voda, 41A, 700487 Iasi, Romania
- 4 Center of Organic Chemistry "C. D. Nenitzescu", Roumanian Academy, Spl Independentei 202B, 060023 Bucharest, Romania

\* Correspondence: Correspondence: M.M.P. [mirelupb@gmail.com](mailto:mirelupb@gmail.com); F.D. [fdumitra@yahoo.com](mailto:fdumitra@yahoo.com);

## 1. X-Ray diffraction analysis

**Table 1S.** Deviations (Å) of the atoms from mean least-squares plane for molecule **3**.

| atom                             | Part A | Part B   |
|----------------------------------|--------|----------|
| Br1*                             | -0.085 | 0.026    |
| Br2*                             | 0.061  | 0.184    |
| C1*                              | -0.031 | 0.-0.103 |
| C2*                              | 0.001  | -0.013   |
| C3*                              | 0.027  | 0.065    |
| C4*                              | 0.041  | 0.072    |
| C5*                              | 0.017  | -0.008   |
| C6*                              | -0.014 | -0.099   |
| C7*                              | -0.043 | 0.087    |
| C8*                              | 0.032  | 0.070    |
| N1*                              | -0.065 | -0.238   |
| O1*                              | 0.037  | 0.371    |
| O2*                              | 0.098  | -0.186   |
| RMS deviation<br>of fitted atoms | 0.053  | 0.160    |

\*indicates atom used to define plane.

**Table 2S..** Deviations (Å) of the atoms from mean least-squares plane for molecule **4a**, **4b** and **4c**.

| atom          | <b>4a</b> | <b>4b</b> | <b>4c</b> |
|---------------|-----------|-----------|-----------|
| Br1*          | -         | 0.181     | 0.348     |
| Br2*          | -         | -         | -0.239    |
| C1*           | 0.026     | -0.001    | 0.147     |
| C2*           | 0.240     | 0.245     | 0.161     |
| C3*           | 0.276     | 0.292     | 0.049     |
| C4*           | 0.100     | 0.105     | -0.069    |
| C5*           | -0.112    | -0.147    | -0.068    |
| C6*           | -0.140    | -0.203    | 0.030     |
| C7*           | 0.435     | 0.613     | -0.729    |
| C8*           | 0.176     | 0.290     | -0.180    |
| N1*           | -0.553    | -0.801    | 1.381     |
| O1*           | -0.430    | -0.605    | 1.157     |
| O2*           | 0.341     | 0.576     | -0.557    |
| RMS deviation | 0.294     | 0.405     | 0.626     |

|                 |  |  |  |
|-----------------|--|--|--|
| of fitted atoms |  |  |  |
|-----------------|--|--|--|

\*indicates atom used to define plane

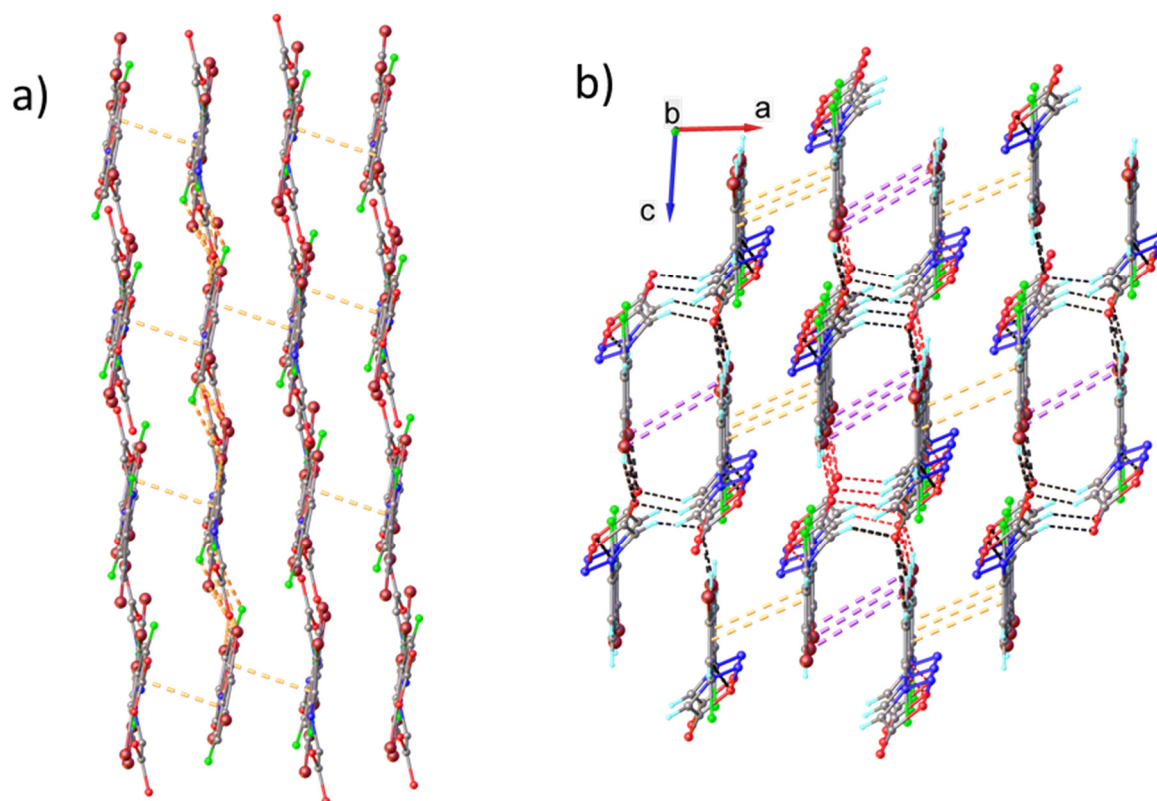

**Figure 1S.** Partial view of 3D network in the crystal structure of compounds 3 (a), and 4b (b). Interlayer centroid-to-centroid distances are showing in dashed-orange lines.

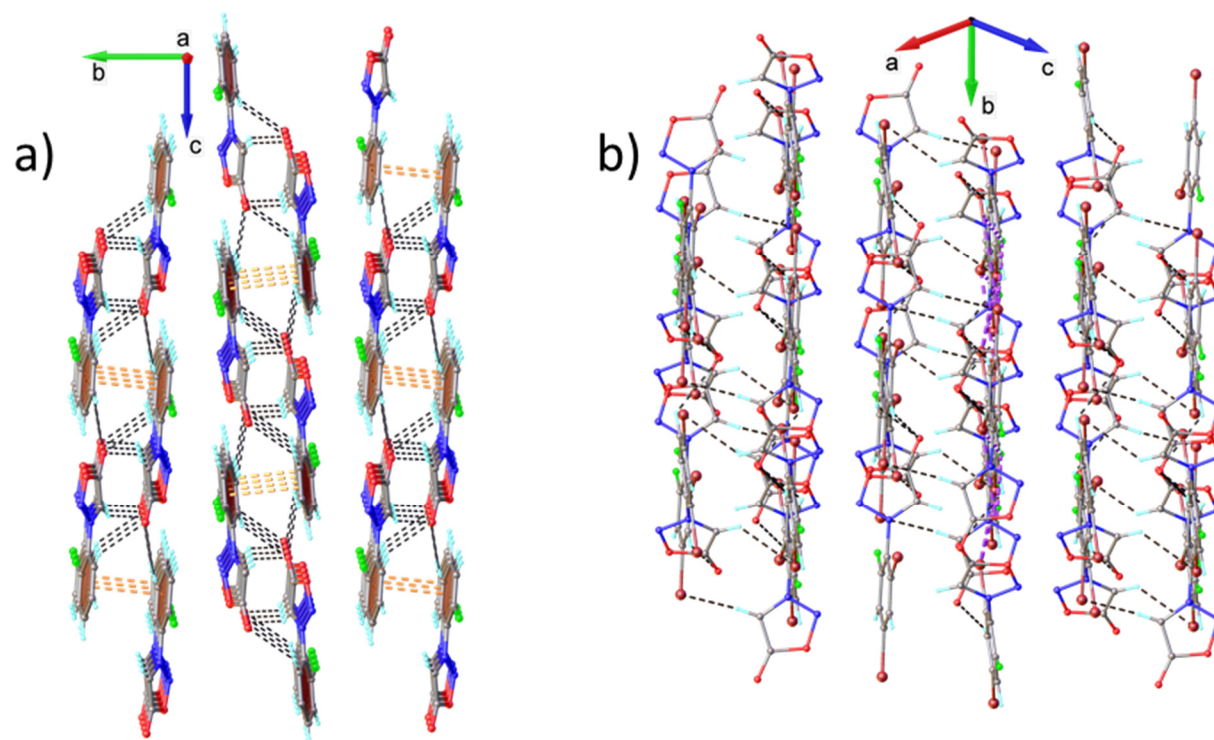

**Figure 2S.** Partial view of the crystal structure for compounds 4a (a), and 4c (b) showing the parallel packing of 2D double layers.

**Table 3S** Bond distances (Å) and angles (°).  
Compound 3.

| Bond      | Molecule A | Molecule B |
|-----------|------------|------------|
| Br1-C2    | 1.892(5)   | 1.889(5)   |
| Br2-C4    | 1.888(5)   | 1.889(6)   |
| F1-C6     | 1.363(6)   | 1.366(6)   |
| O1-C8     | 1.312(6)   | 1.324(6)   |
| O2-C8     | 1.213(6)   | 1.198(6)   |
| N1-C1     | 1.361(6)   | 1.370(6)   |
| N1-C7     | 1.411(6)   | 1.434(6)   |
| C1-C2     | 1.412(7)   | 1.402(7)   |
| C1-C6     | 1.392(7)   | 1.381(8)   |
| C2-C3     | 1.370(7)   | 1.382(6)   |
| C3-C4     | 1.359(7)   | 1.361(7)   |
| C4-C5     | 1.381(8)   | 1.391(8)   |
| C5-C6     | 1.359(7)   | 1.372(7)   |
| C7-C8     | 1.497(7)   | 1.508(7)   |
| Angle     | Molecule A | Molecule B |
| C1-N1-C7  | 127.5(4)   | 124.4(5)   |
| N1-C1-C2  | 121.6(5)   | 121.1(5)   |
| N1-C1-C6  | 125.3(5)   | 125.1(5)   |
| C6-C1-C2  | 113.1(5)   | 113.7(5)   |
| C1-C2-Br1 | 117.7(4)   | 118.7(4)   |
| C3-C2-Br1 | 119.0(4)   | 117.8(4)   |
| C3-C2-C1  | 123.2(5)   | 123.6(5)   |
| C4-C3-C2  | 120.1(6)   | 118.9(5)   |
| C3-C4-Br2 | 120.7(5)   | 120.2(5)   |
| C3-C4-C5  | 119.8(5)   | 120.9(5)   |
| C5-C4-Br2 | 119.5(5)   | 118.9(5)   |
| C6-C5-C4  | 118.8(5)   | 117.5(6)   |
| F1-C6-C1  | 117.9(5)   | 118.5(5)   |
| C5-C6-F1  | 117.1(5)   | 116.2(6)   |
| C5-C6-C1  | 125.0(6)   | 125.3(6)   |
| N1-C7-C8  | 110.1(4)   | 108.2(5)   |
| O1-C8-C7  | 112.3(5)   | 111.3(5)   |
| O2-C8-O1  | 124.4(5)   | 124.8(6)   |



|          |          |          |
|----------|----------|----------|
| O2-C8-C7 | 123.3(5) | 123.8(5) |
|----------|----------|----------|

**Compound 4a.**

|       |          |
|-------|----------|
| F1-C6 | 1.354(3) |
| O1-N1 | 1.379(2) |
| O1-C8 | 1.414(3) |
| O2-C8 | 1.220(3) |
| N1-N2 | 1.317(2) |
| N2-C1 | 1.444(3) |
| N2-C7 | 1.335(3) |
| C1-C2 | 1.379(3) |
| C1-C6 | 1.368(3) |
| C2-C3 | 1.388(3) |
| C3-C4 | 1.381(3) |
| C4-C5 | 1.380(3) |
| C5-C6 | 1.382(3) |

|          |            |
|----------|------------|
| N1-O1-C8 | 111.13(17) |
| N2-N1-O1 | 103.24(18) |
| N1-N2-C1 | 116.12(19) |
| N1-N2-C7 | 115.23(19) |
| C7-N2-C1 | 128.6(2)   |
| C2-C1-N2 | 119.7(2)   |
| C6-C1-N2 | 120.6(2)   |
| C6-C1-C2 | 119.7(2)   |
| C1-C2-C3 | 119.6(2)   |
| C4-C3-C2 | 119.9(2)   |
| C5-C4-C3 | 120.7(2)   |
| C4-C5-C6 | 118.4(2)   |
| F1-C6-C1 | 119.8(2)   |
| F1-C6-C5 | 118.5(2)   |

|                 |                 |
|-----------------|-----------------|
| <b>C1-C6-C5</b> | <b>121.7(2)</b> |
| <b>N2-C7-C8</b> | <b>106.8(2)</b> |
| <b>O2-C8-O1</b> | <b>119.5(2)</b> |
| <b>O2-C8-C7</b> | <b>136.9(3)</b> |
| <b>C7-C8-O1</b> | <b>103.5(2)</b> |

**Compound 4b.**

|               |                 |
|---------------|-----------------|
| <b>Br1-C4</b> | <b>1.895(3)</b> |
| <b>F1-C6</b>  | <b>1.352(3)</b> |
| <b>O1-N1</b>  | <b>1.377(3)</b> |
| <b>O1-C8</b>  | <b>1.418(3)</b> |
| <b>O2-C8</b>  | <b>1.207(3)</b> |
| <b>N1-N2</b>  | <b>1.322(3)</b> |
| <b>N2-C1</b>  | <b>1.437(3)</b> |
| <b>N2-C7</b>  | <b>1.336(3)</b> |
| <b>C1-C2</b>  | <b>1.372(3)</b> |
| <b>C1-C6</b>  | <b>1.374(3)</b> |
| <b>C2-C3</b>  | <b>1.386(3)</b> |
| <b>C3-C4</b>  | <b>1.375(3)</b> |
| <b>C4-C5</b>  | <b>1.366(3)</b> |
| <b>C5-C6</b>  | <b>1.372(3)</b> |
| <b>C7-C8</b>  | <b>1.406(3)</b> |

|                 |                 |
|-----------------|-----------------|
| <b>N1-O1-C8</b> | <b>112.1(2)</b> |
| <b>N2-N1-O1</b> | <b>102.8(2)</b> |
| <b>N1-N2-C1</b> | <b>117.0(2)</b> |
| <b>N1-N2-C7</b> | <b>115.5(2)</b> |
| <b>C7-N2-C1</b> | <b>127.5(2)</b> |
| <b>C2-C1-N2</b> | <b>119.8(2)</b> |
| <b>C2-C1-C6</b> | <b>119.9(3)</b> |
| <b>C6-C1-N2</b> | <b>120.2(3)</b> |

|                  |                 |
|------------------|-----------------|
| <b>C1-C2-C3</b>  | <b>119.5(3)</b> |
| <b>C4-C3-C2</b>  | <b>119.1(3)</b> |
| <b>C3-C4-Br1</b> | <b>119.2(2)</b> |
| <b>C5-C4-Br1</b> | <b>118.8(2)</b> |
| <b>C5-C4-C3</b>  | <b>121.9(3)</b> |
| <b>C4-C5-C6</b>  | <b>118.1(3)</b> |
| <b>F1-C6-C1</b>  | <b>119.4(2)</b> |
| <b>F1-C6-C5</b>  | <b>119.2(2)</b> |
| <b>C5-C6-C1</b>  | <b>121.4(3)</b> |
| <b>N2-C7-C8</b>  | <b>106.9(3)</b> |
| <b>O2-C8-O1</b>  | <b>120.1(3)</b> |
| <b>O2-C8-C7</b>  | <b>137.2(3)</b> |
| <b>C7-C8-O1</b>  | <b>102.8(3)</b> |

#### Compound 4c

|               |                 |
|---------------|-----------------|
| <b>Br1-C2</b> | <b>1.888(4)</b> |
| <b>Br2-C4</b> | <b>1.895(4)</b> |
| <b>F1-C6</b>  | <b>1.343(4)</b> |
| <b>O2-C8</b>  | <b>1.208(5)</b> |
| <b>N2-C1</b>  | <b>1.440(5)</b> |
| <b>N2-C7</b>  | <b>1.313(5)</b> |
| <b>N2-N1</b>  | <b>1.322(6)</b> |
| <b>C1-C2</b>  | <b>1.376(5)</b> |
| <b>C1-C6</b>  | <b>1.379(5)</b> |
| <b>C2-C3</b>  | <b>1.380(5)</b> |
| <b>C3-C4</b>  | <b>1.367(5)</b> |
| <b>C4-C5</b>  | <b>1.380(5)</b> |
| <b>C5-C6</b>  | <b>1.374(5)</b> |
| <b>C7-C8</b>  | <b>1.389(5)</b> |
| <b>C8-O1</b>  | <b>1.394(9)</b> |

|       |           |
|-------|-----------|
| O1-N1 | 1.387(13) |
|-------|-----------|

|           |           |
|-----------|-----------|
| C7-N2-C1  | 127.9(4)  |
| C7-N2-N1  | 114.2(8)  |
| N1-N2-C1  | 117.5(8)  |
| C2-C1-N2  | 122.0(3)  |
| C2-C1-C6  | 118.7(4)  |
| C6-C1-N2  | 119.3(3)  |
| C1-C2-Br1 | 120.3(3)  |
| C1-C2-C3  | 120.6(4)  |
| C3-C2-Br1 | 119.1(3)  |
| C4-C3-C2  | 118.4(4)  |
| C3-C4-Br2 | 118.7(3)  |
| C3-C4-C5  | 123.1(4)  |
| C5-C4-Br2 | 118.2(3)  |
| C6-C5-C4  | 116.6(4)  |
| F1-C6-C1  | 118.3(3)  |
| F1-C6-C5  | 119.2(4)  |
| C5-C6-C1  | 122.5(4)  |
| N2-C7-C8  | 107.6(4)  |
| O2-C8-C7  | 138.0(5)  |
| O2-C8-O1  | 117.9(8)  |
| C7-C8-O1  | 104.0(8)  |
| N1-O1-C8  | 110.3(12) |
| N2-N1-O1  | 103.3(13) |

## 2. Hiershfeld analysis

**Table 1.** Fingerprint plots mapping the most important interactions in compounds **3** and **4a-c**

### Compound 3 – independent molecule A

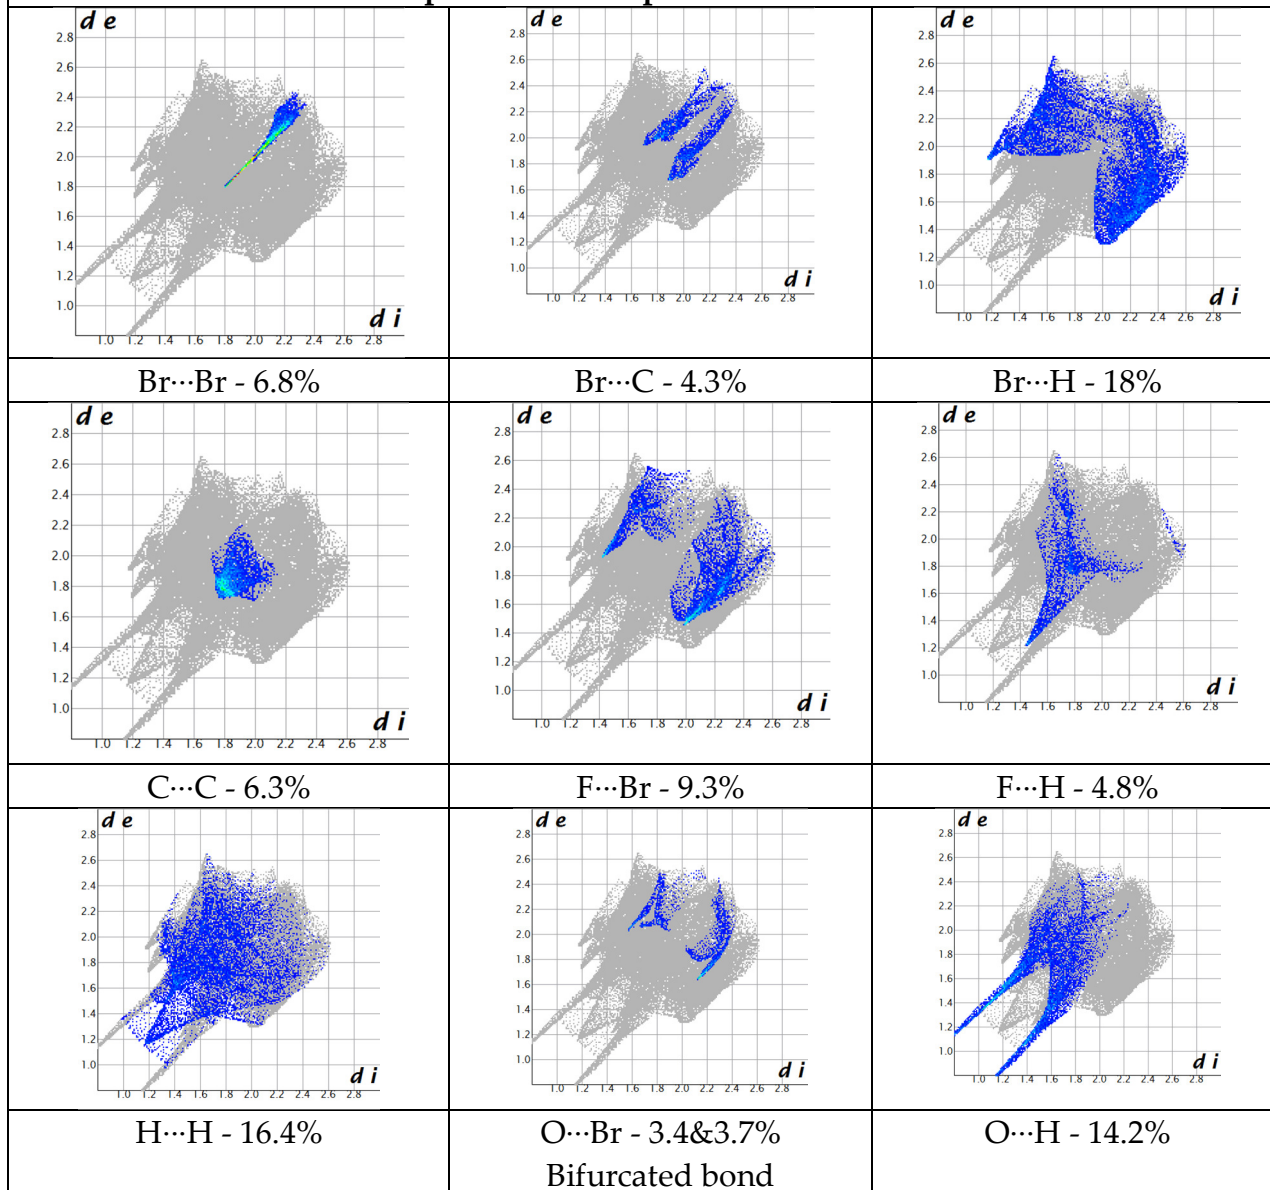

### Compound 3 – independent molecule B

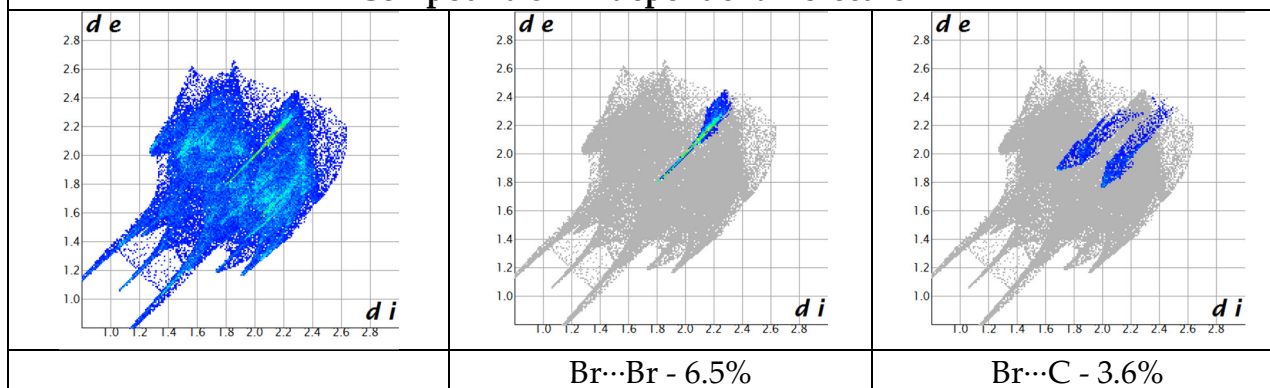

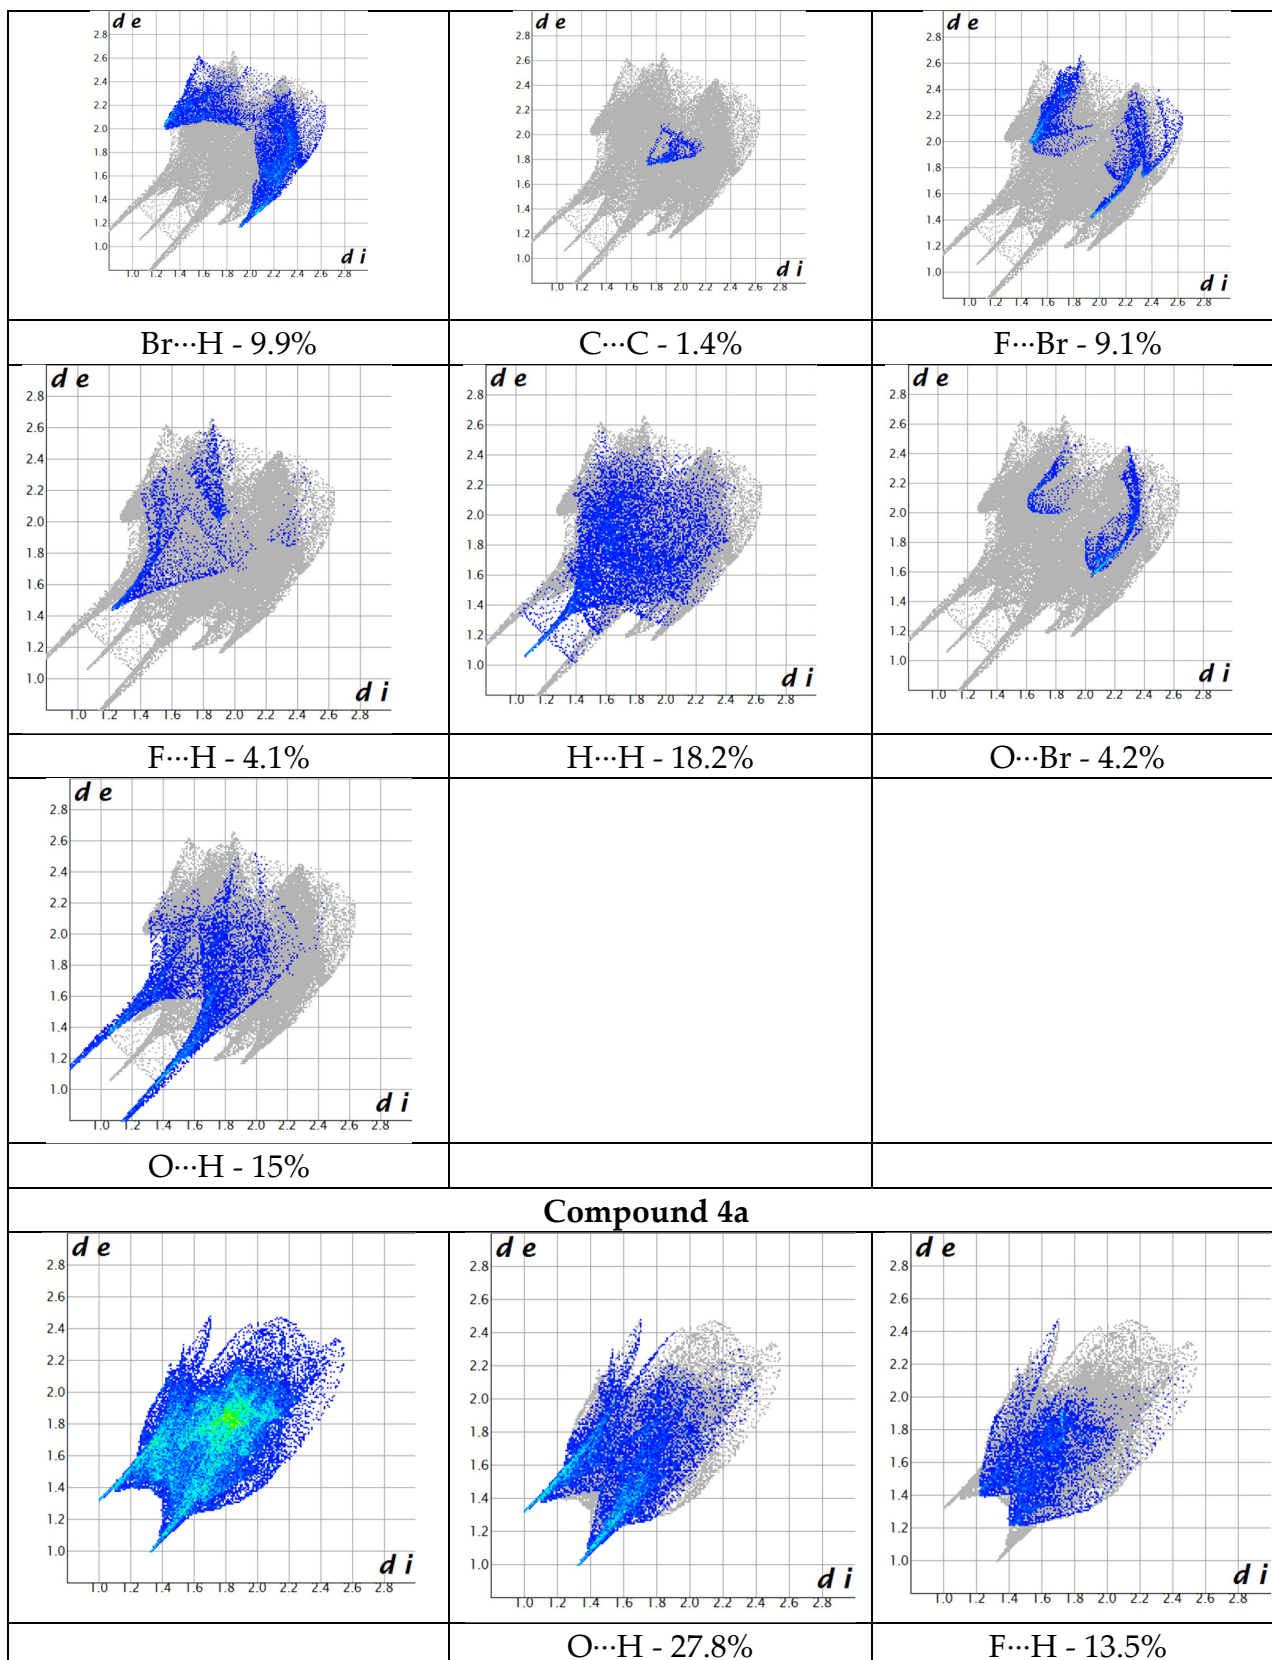

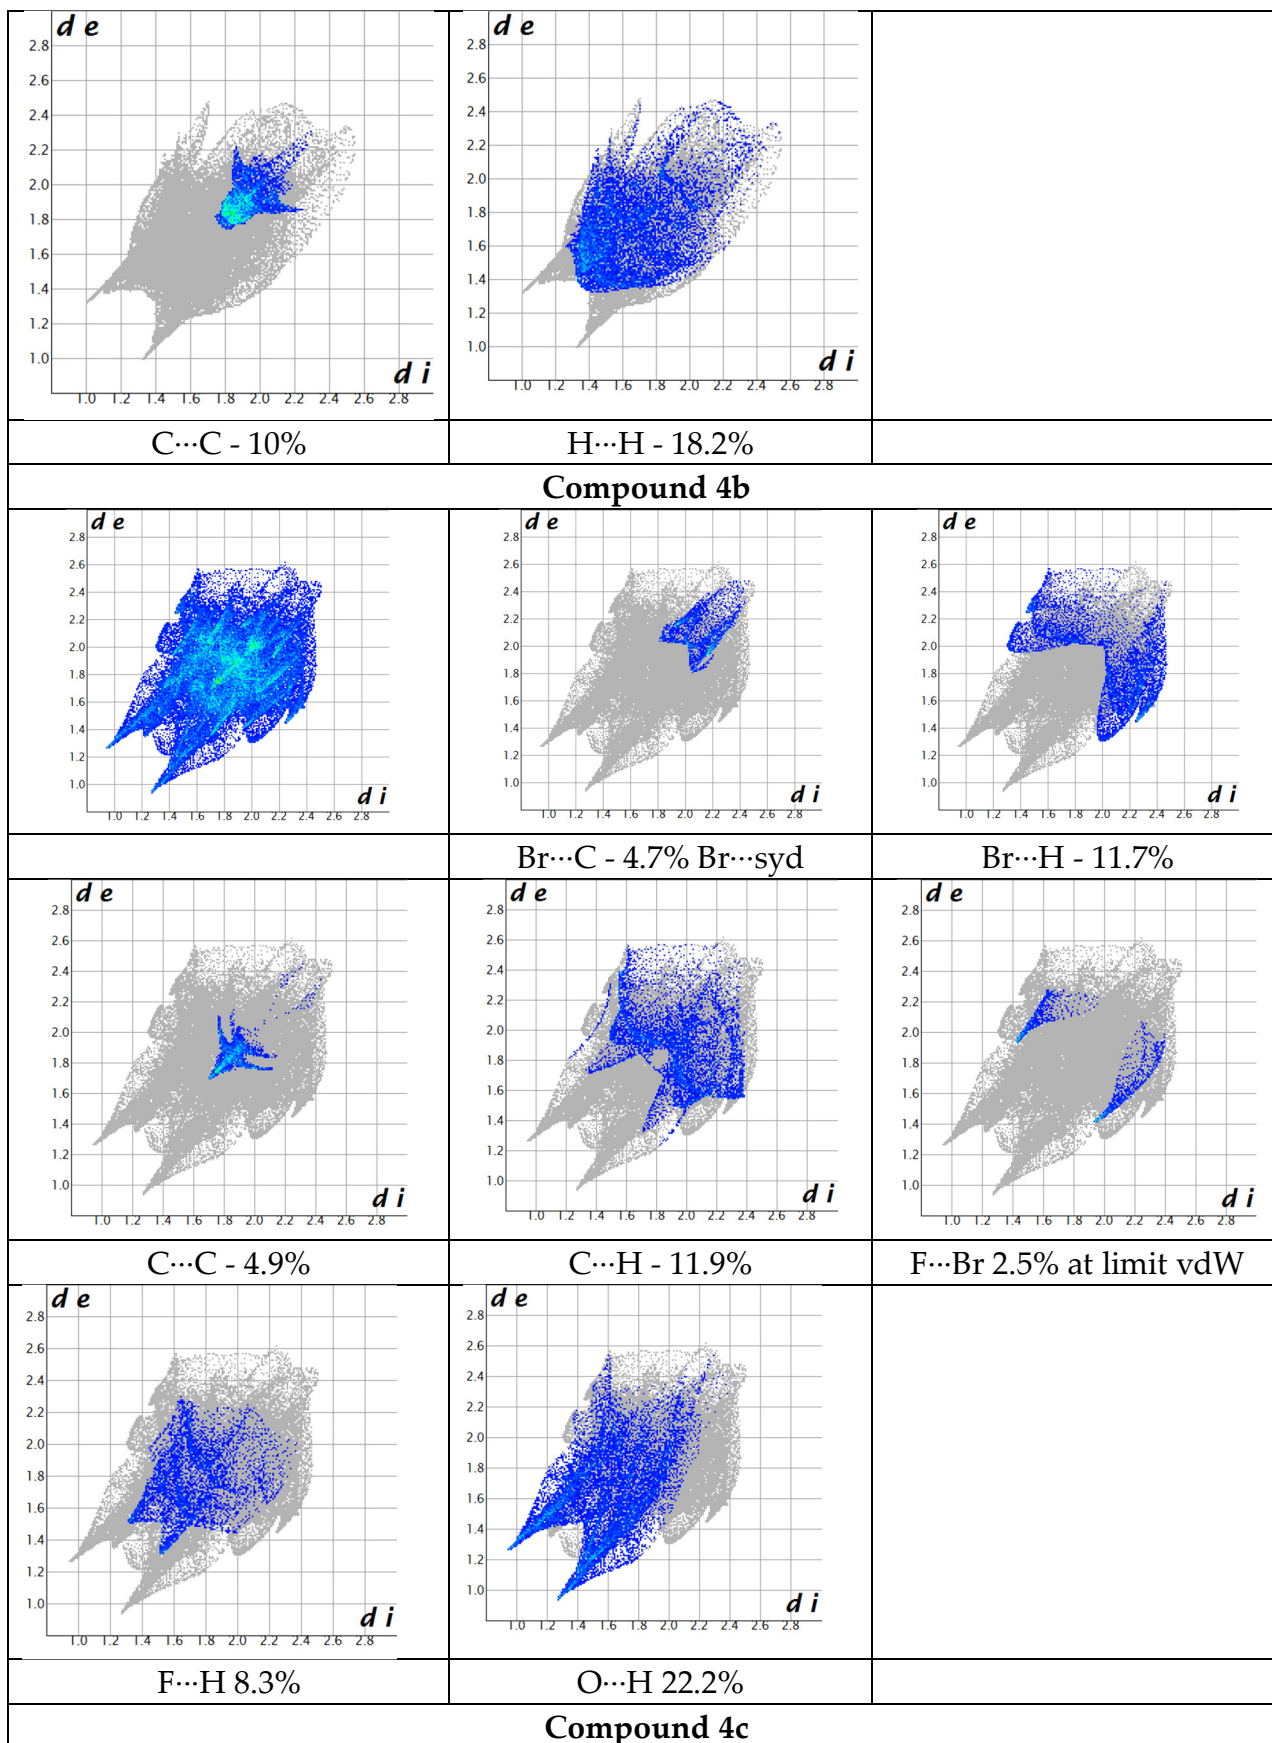



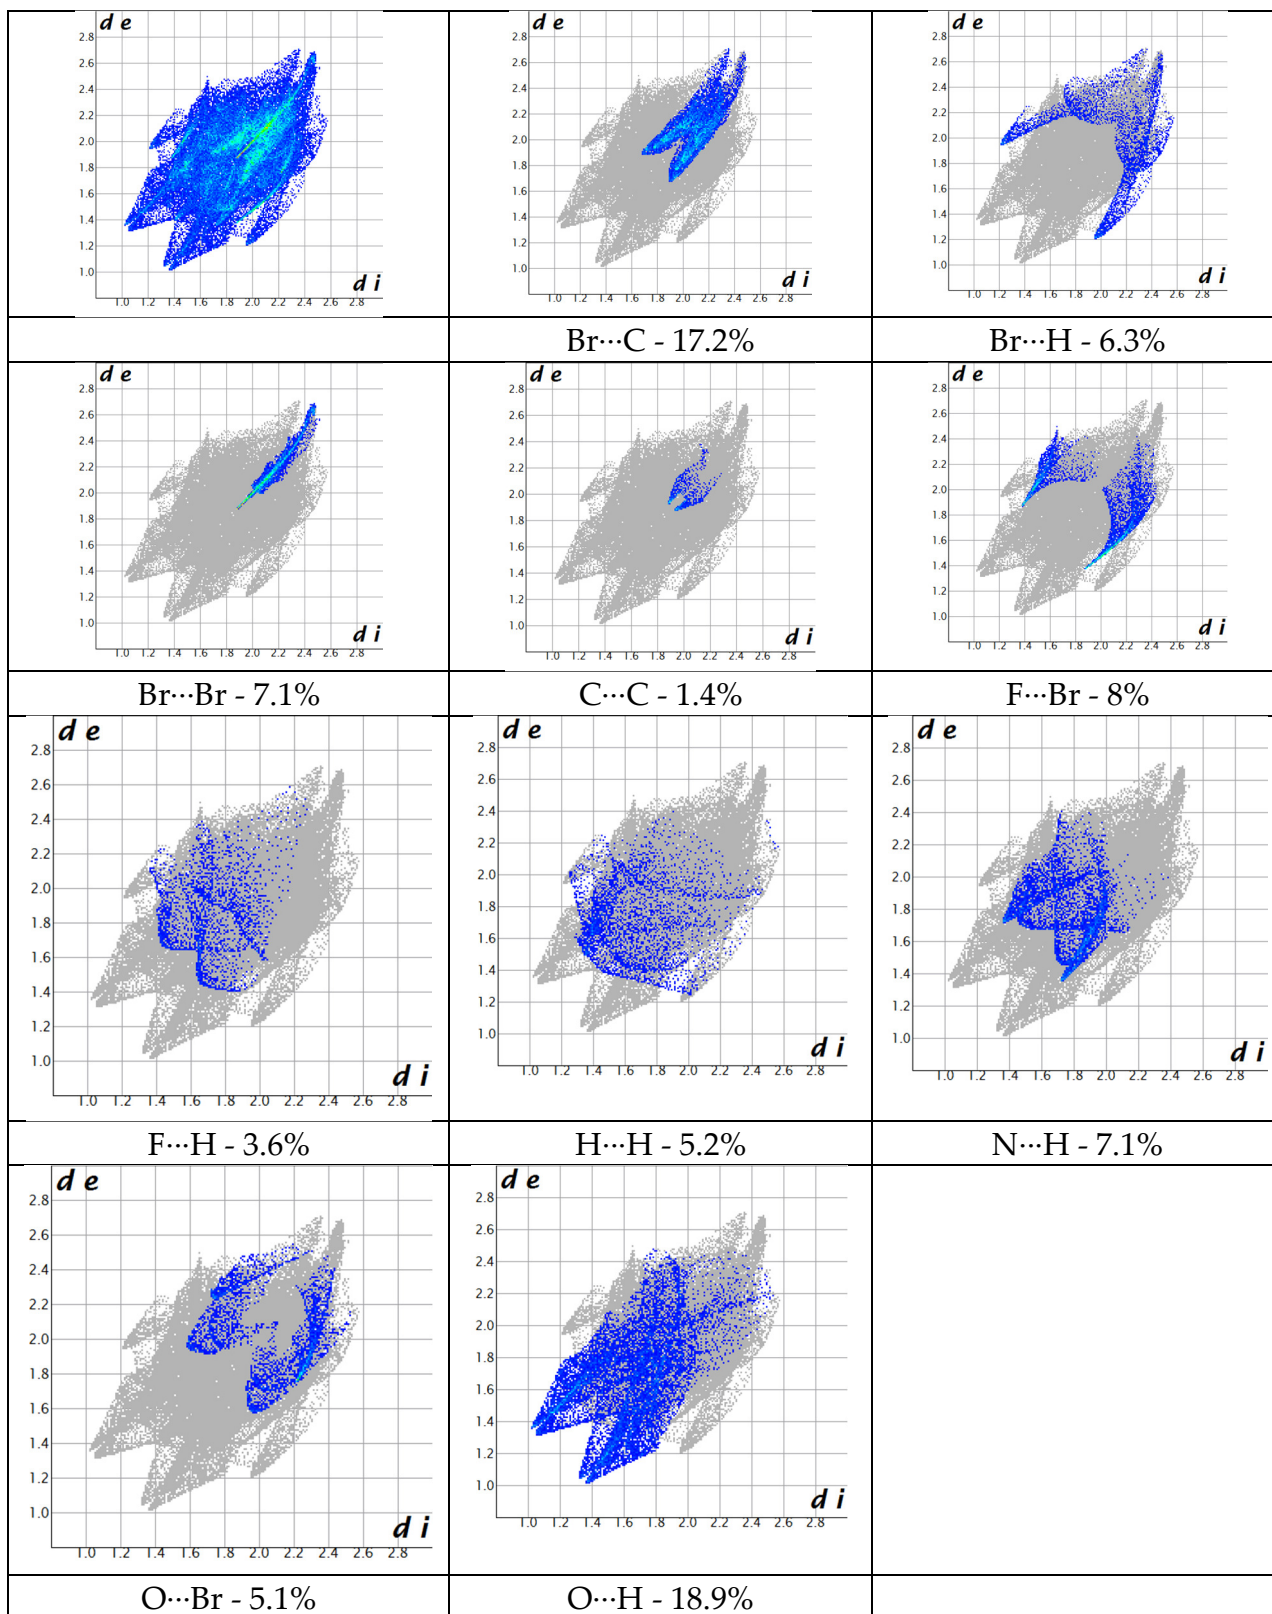



### 3. NMR spectra

#### Compound 1

$^1\text{H}$ -NMR spectrum of 1 recorded at 300 MHz (inset: aromatic protons)

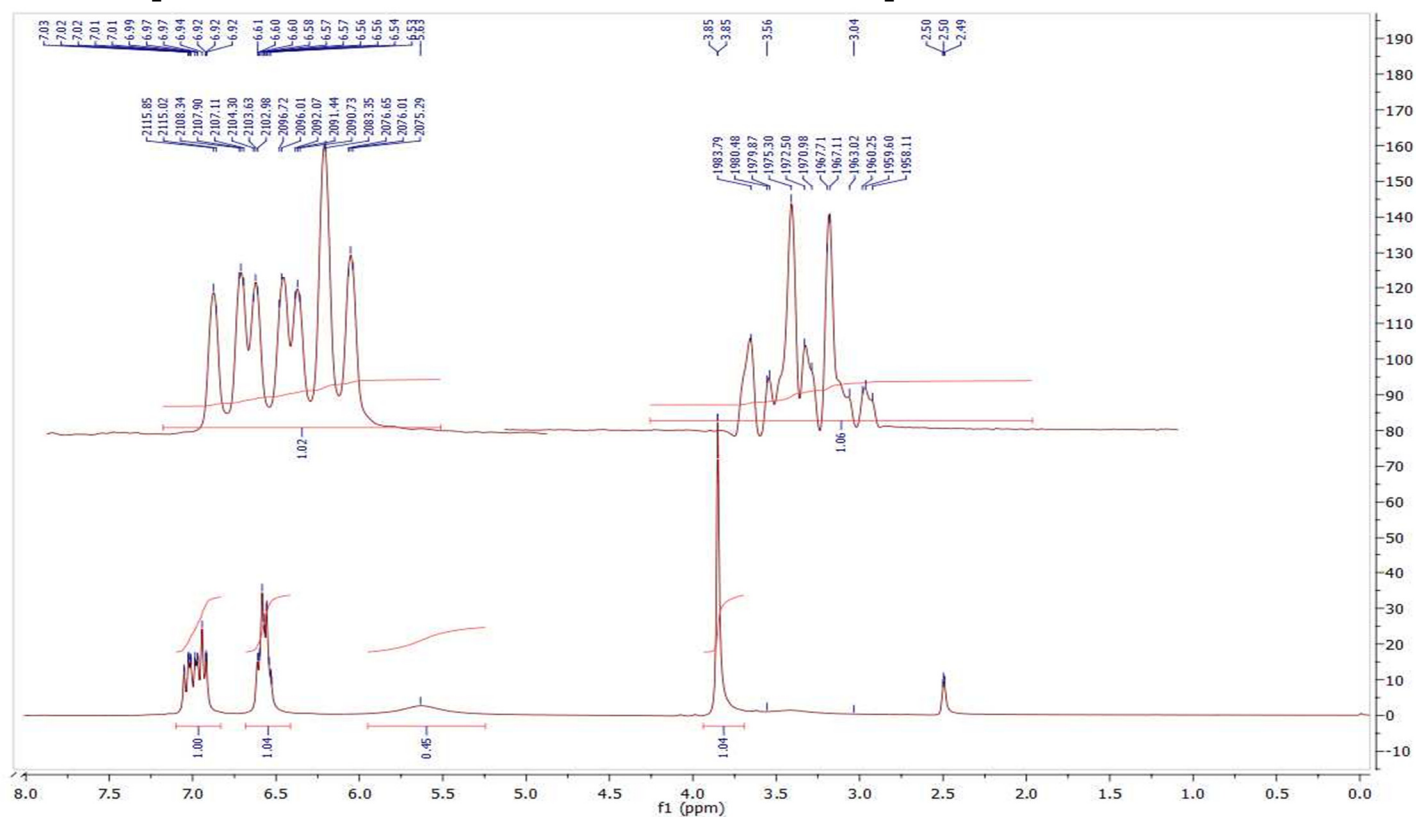

$^{13}\text{C}$ -NMR spectrum of 1 recorded at 75 MHz (inset: aromatic C atoms)

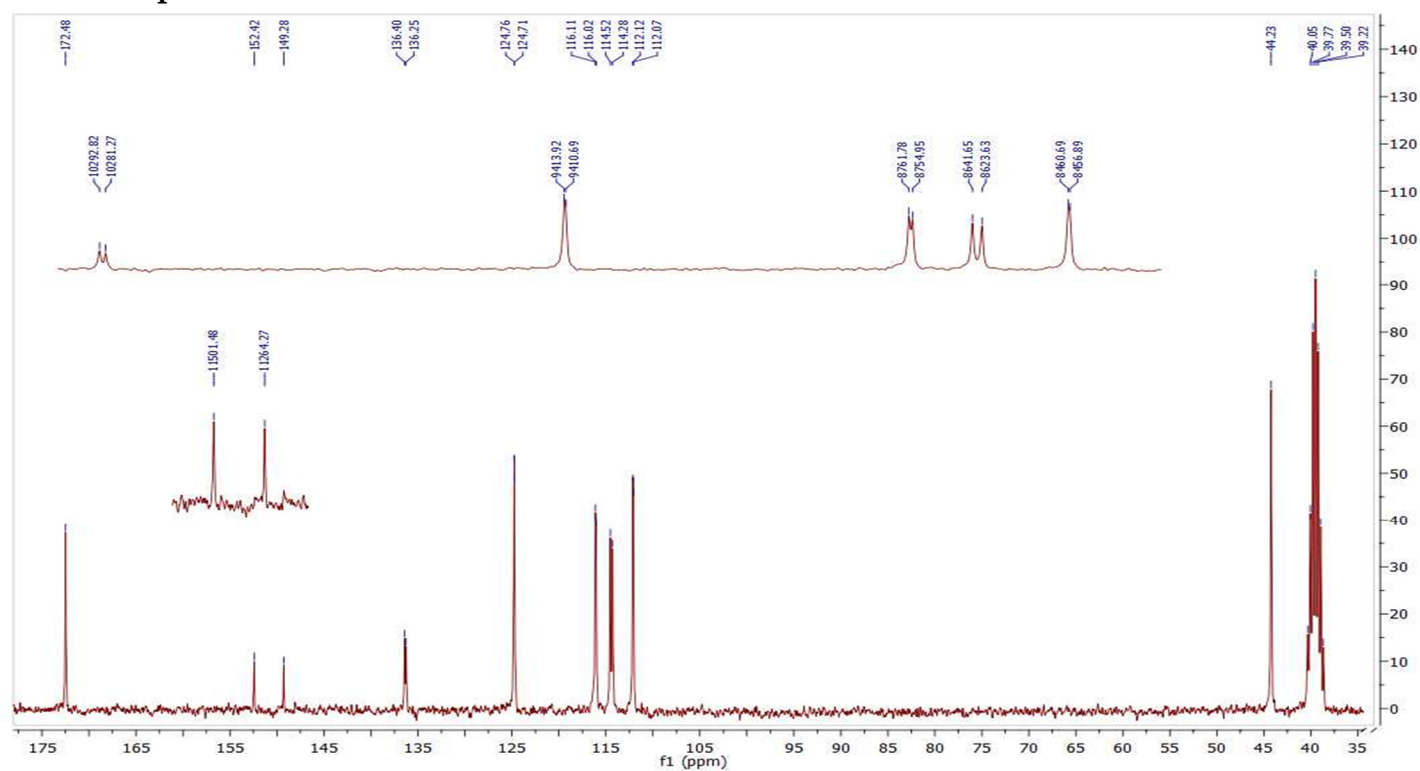

$^1\text{H}$ - $^{13}\text{C}$  Heteronuclear Correlation spectrum (HETCOR) of 1 presenting the  $^1\text{H}$ - $^{13}\text{C}$  signals for the aromatic region of the spectra

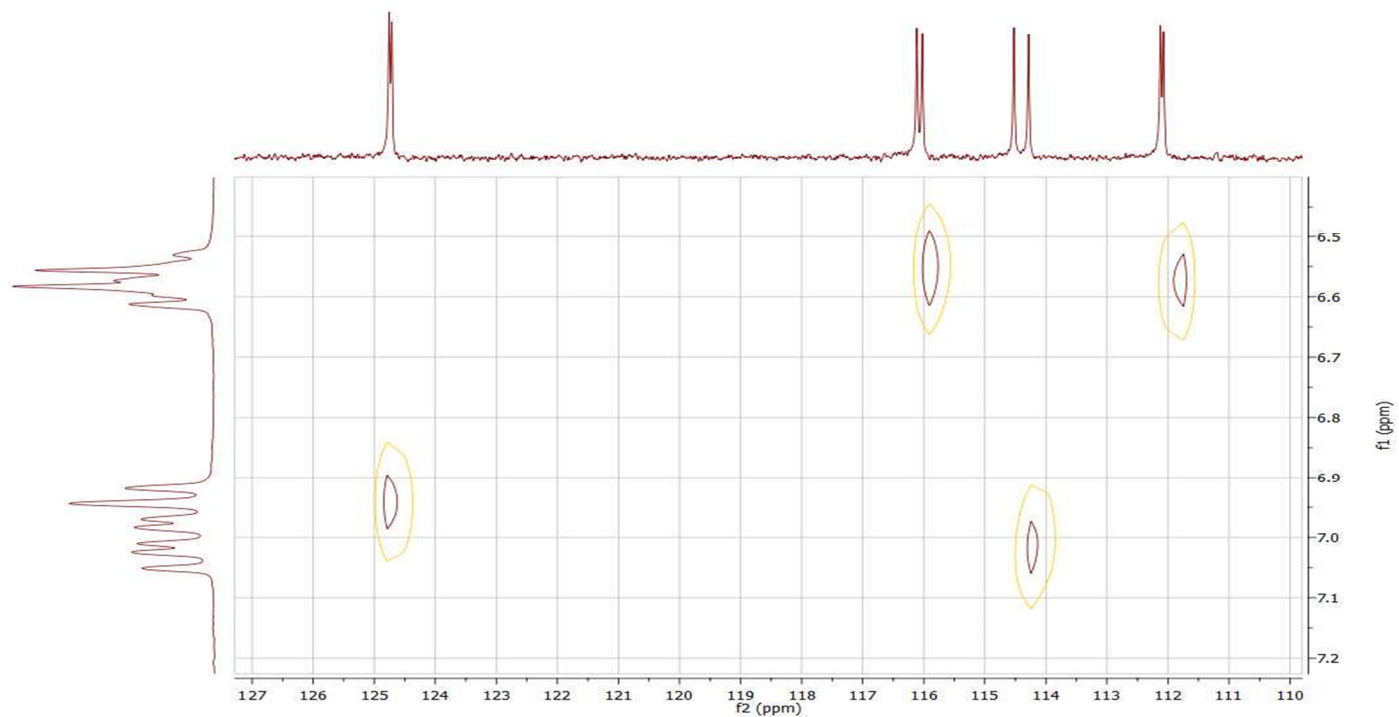

## Compound 2

$^1\text{H}$ -NMR spectrum of 2 recorded at 300 MHz

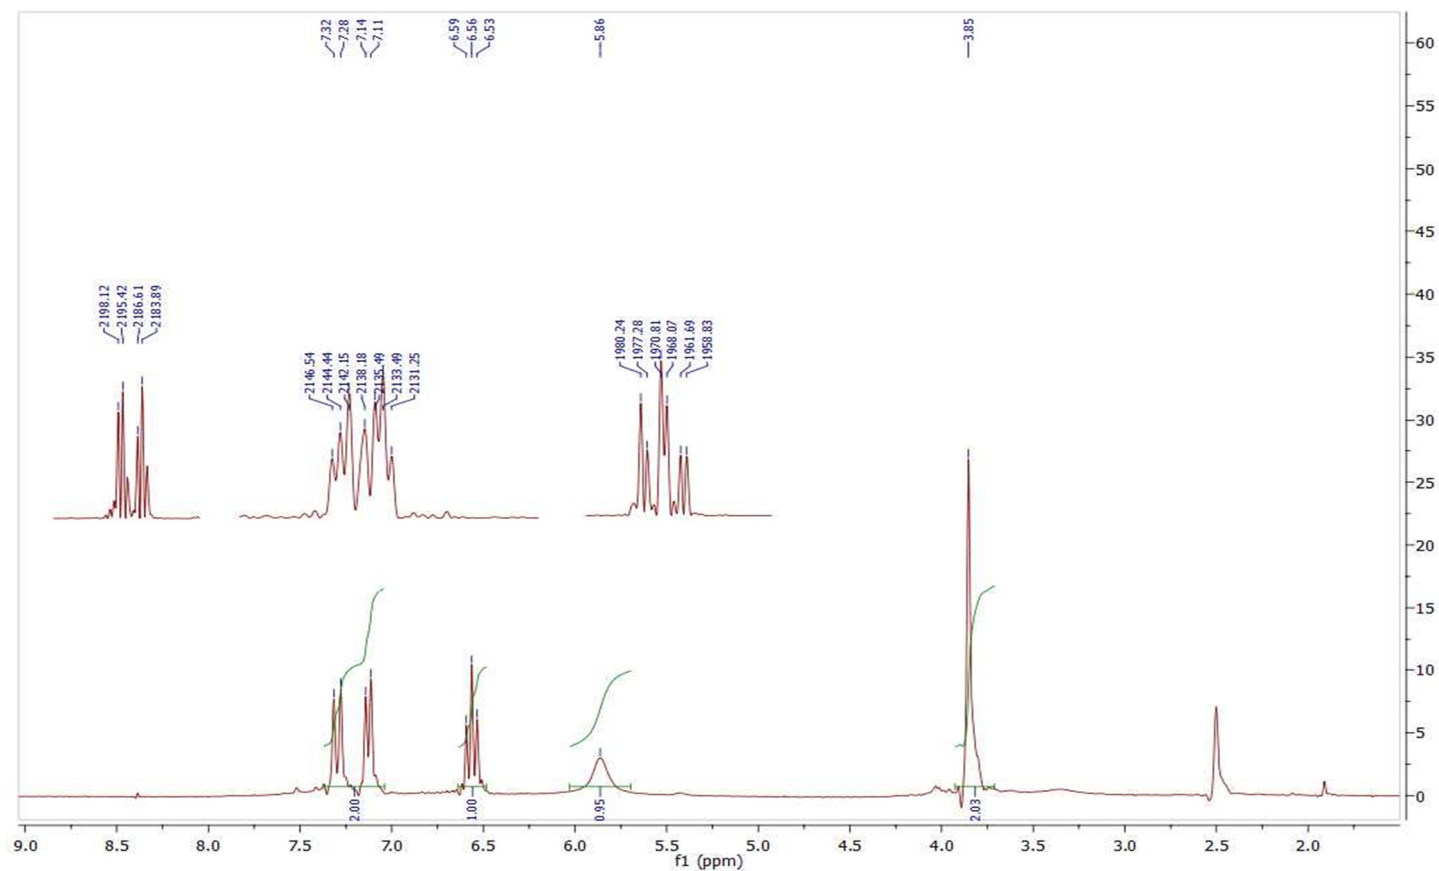

**$^{13}\text{C}$ -NMR spectrum of 2 recorded at 75 MHz**

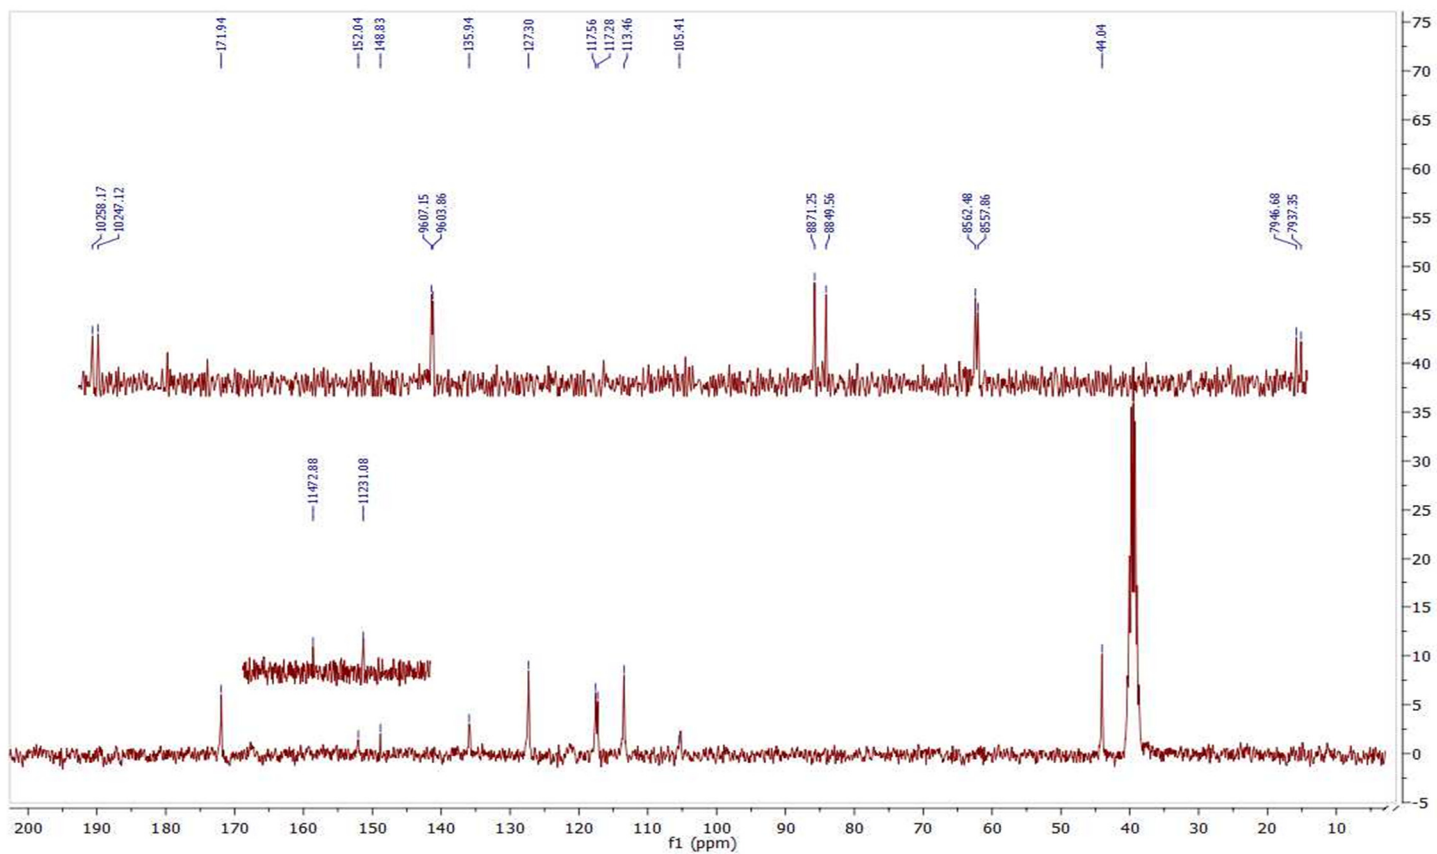

*Compound 3*

<sup>1</sup>H-NMR spectrum of 3 recorded at 300 MHz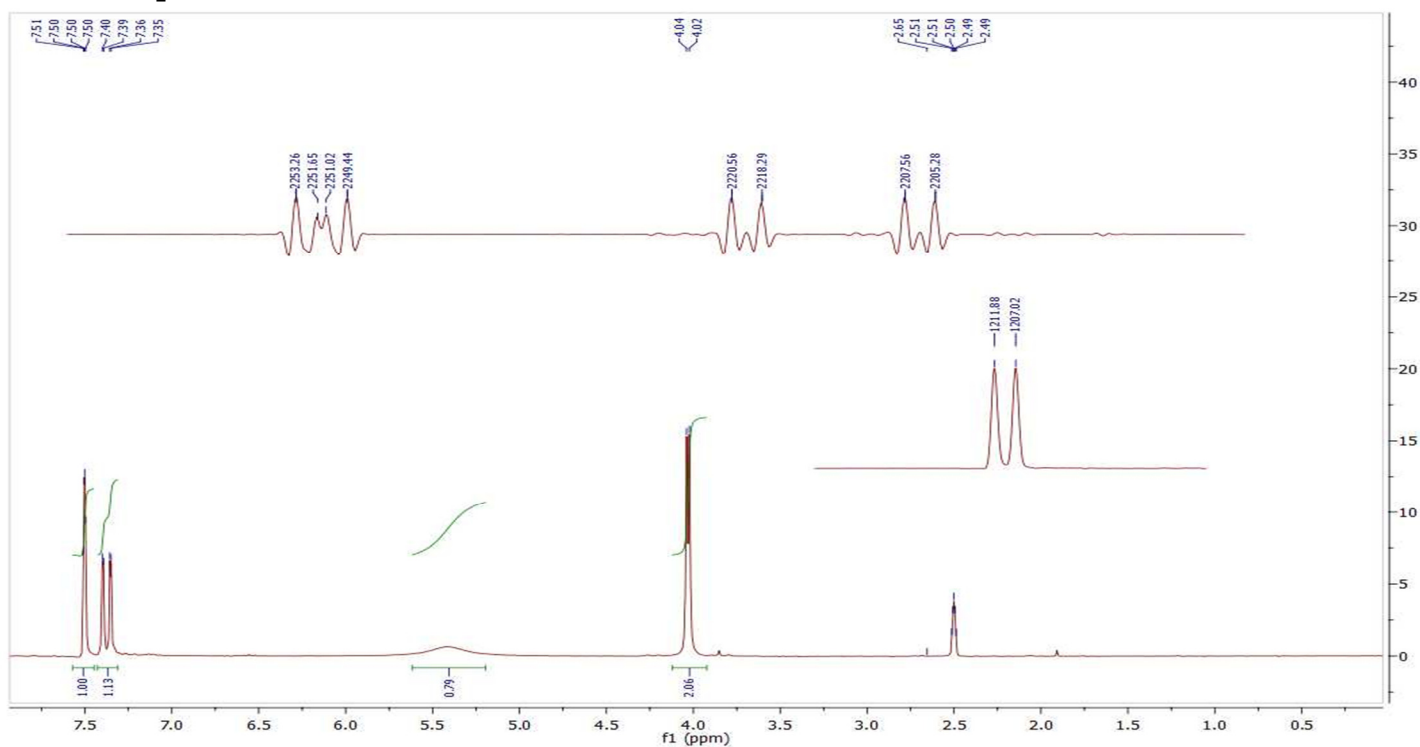

**<sup>13</sup>C-NMR spectrum of 3 recorded at 75 MHz**

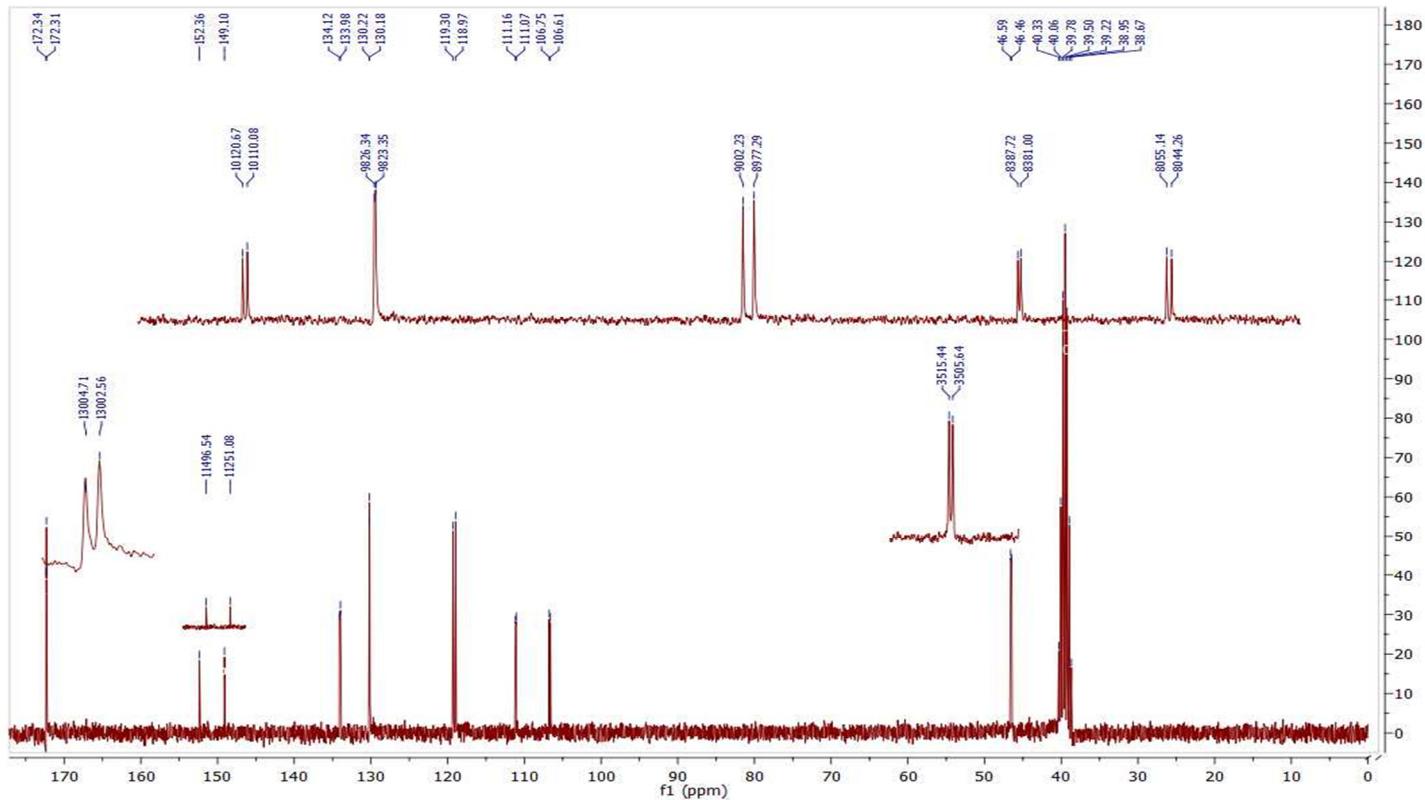

*Compound 4a*

**<sup>1</sup>H-NMR spectrum of 4a recorded at 300 MHz**

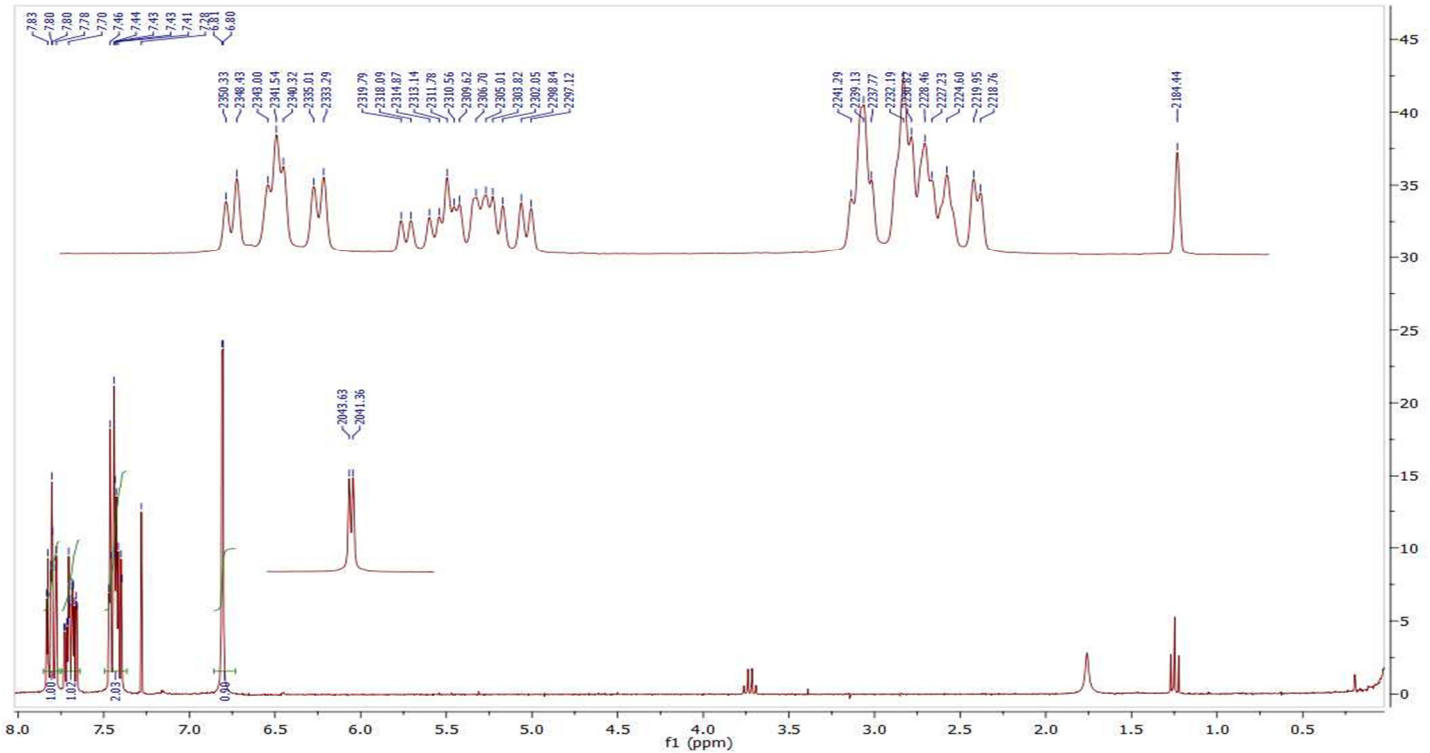

$^{13}\text{C}$ -NMR spectrum of 4a recorded at 75 MHz

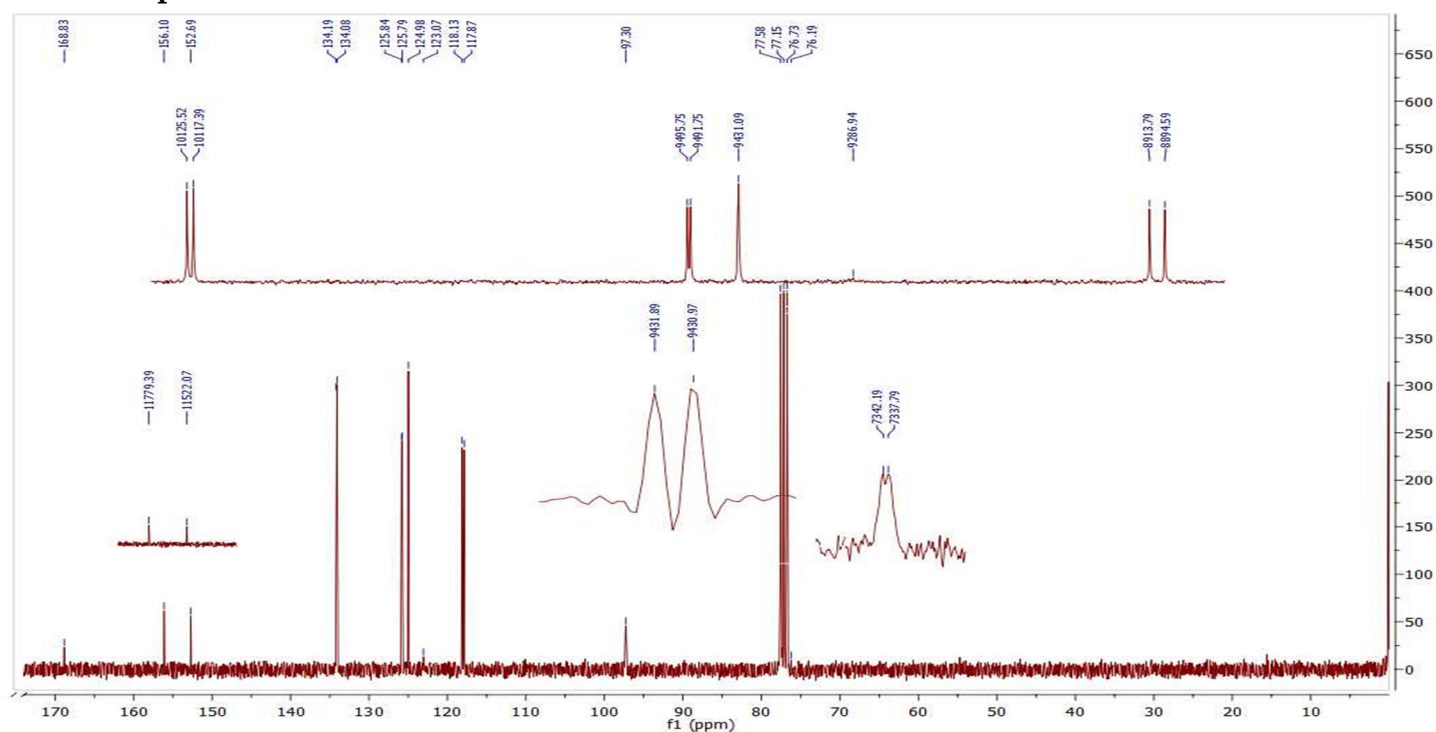

$^{13}\text{C}$ -NMR spectrum of 4a recorded at 75 MHz (added small quantity of  $\text{Cr}(\text{acac})_3$  as NMR relaxation agent)

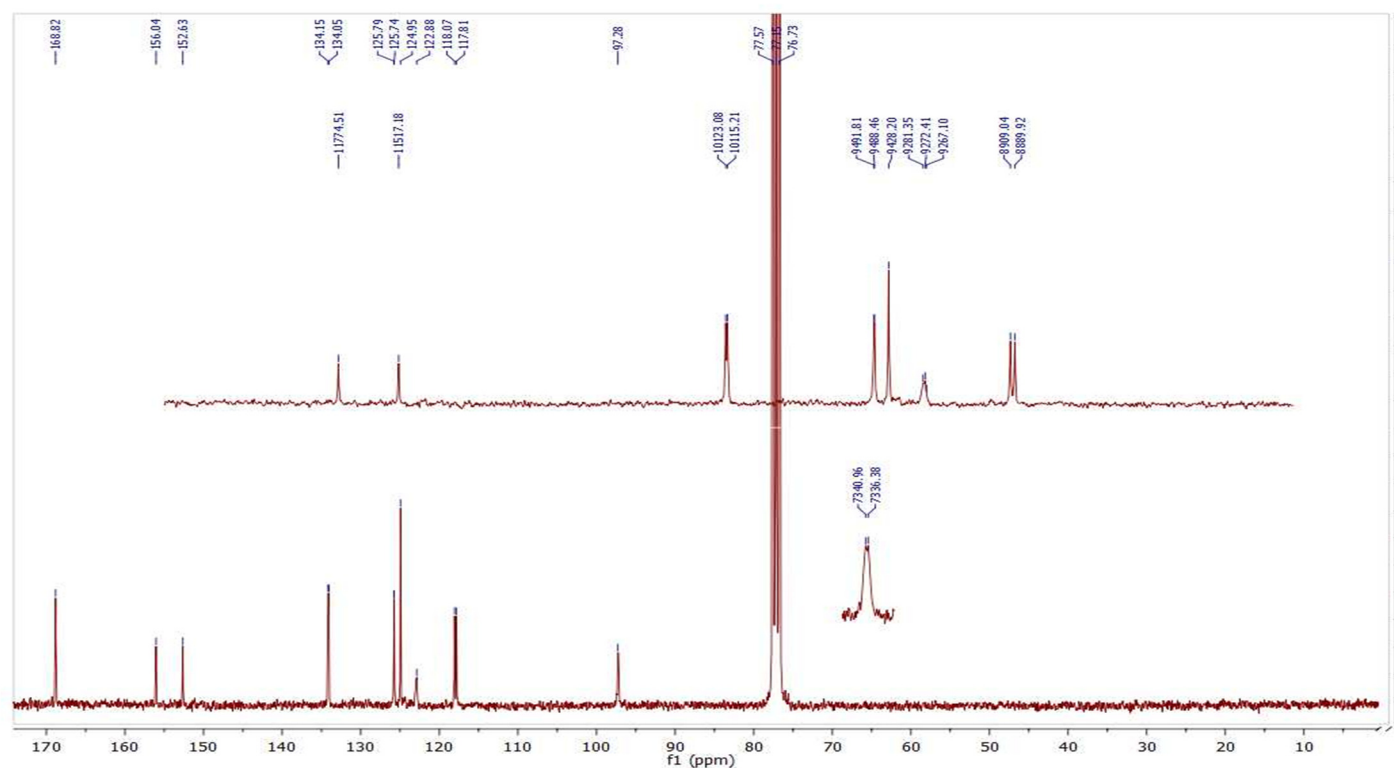

## Compound 4b

$^1\text{H}$ -NMR spectrum of 4b recorded at 300 MHz

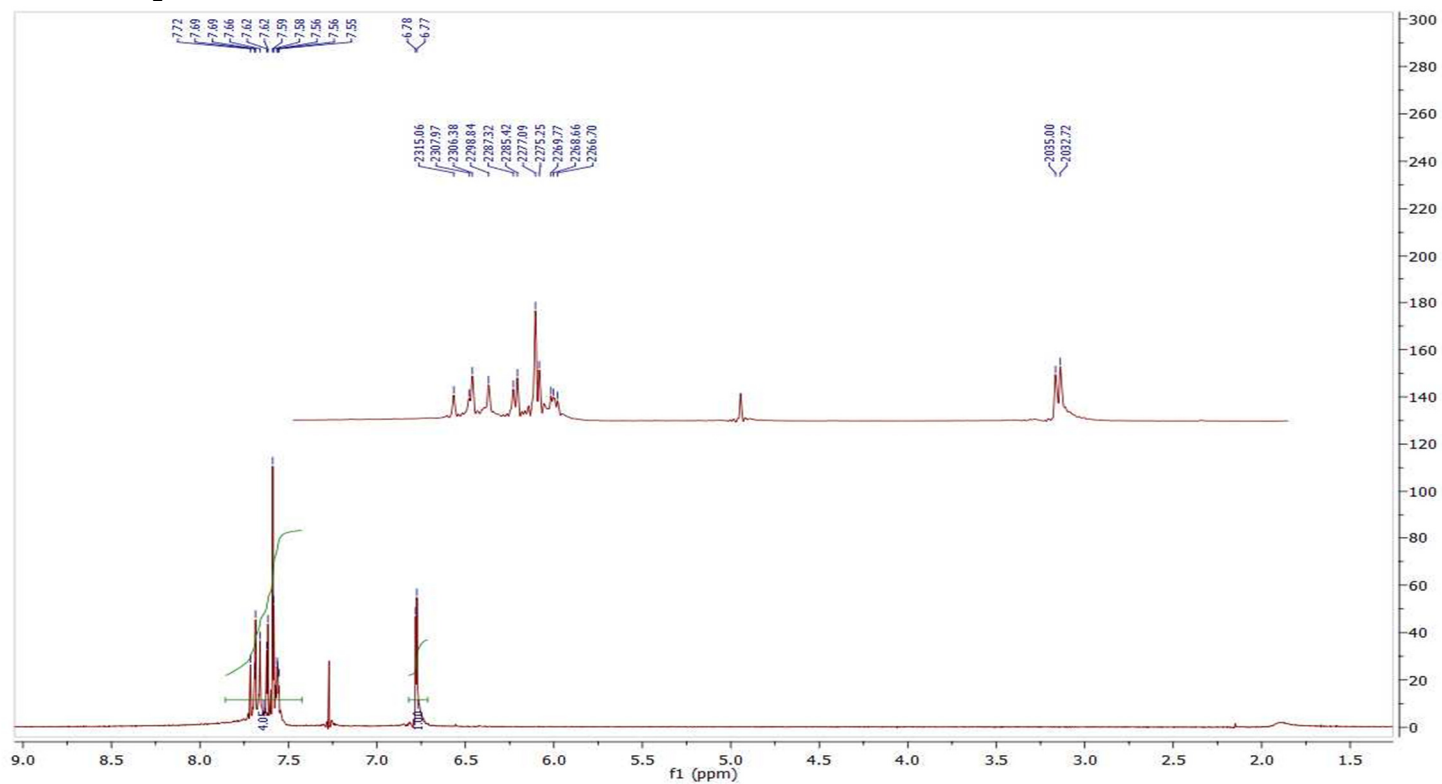

$^{13}\text{C}$ -NMR spectrum of 4b recorded at 75 MHz

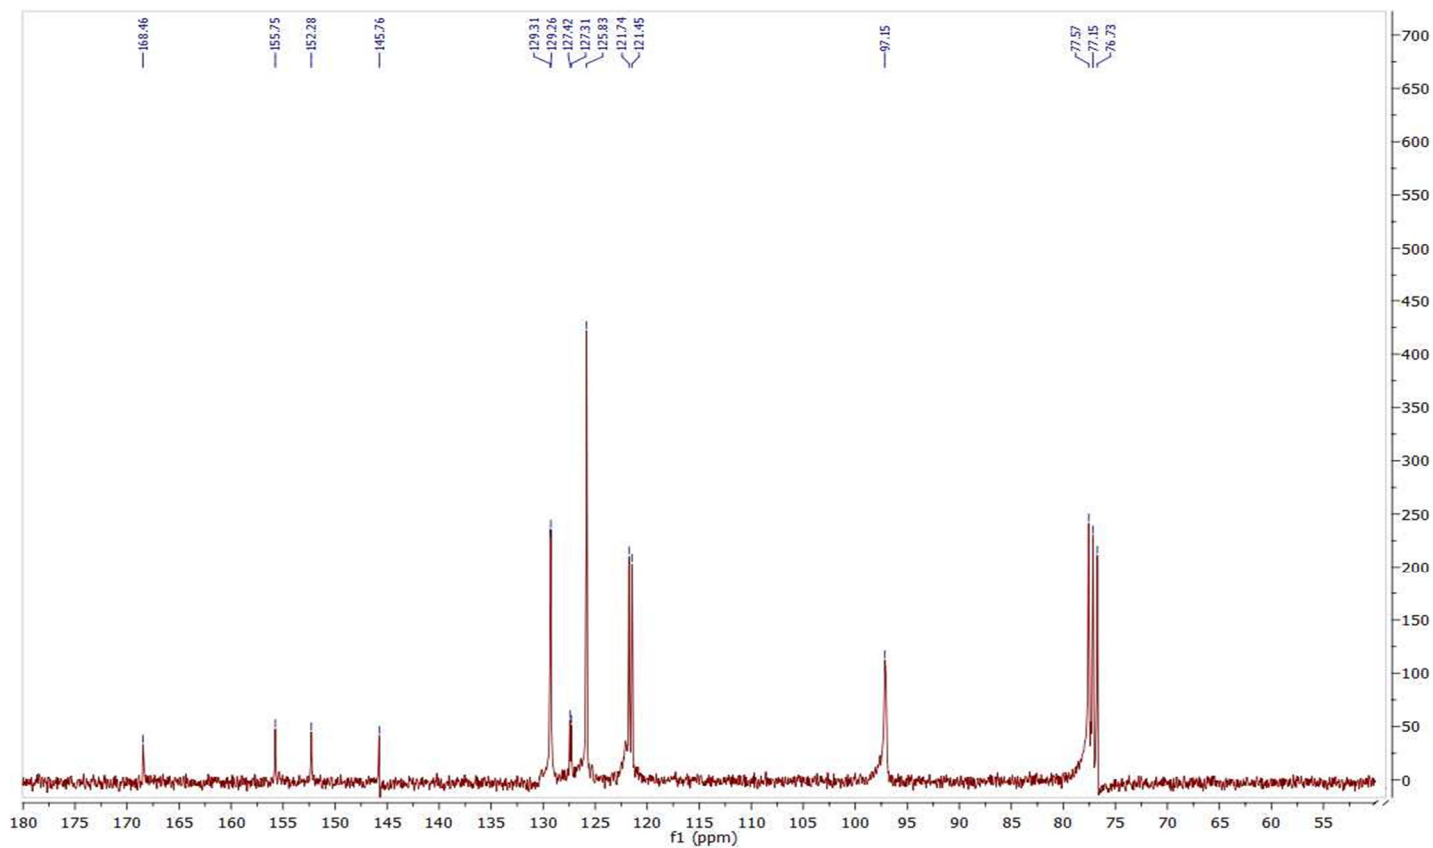

## Compound 4c



$^1\text{H}$ -NMR spectrum of 4c recorded at 400 MHz (DMSO)

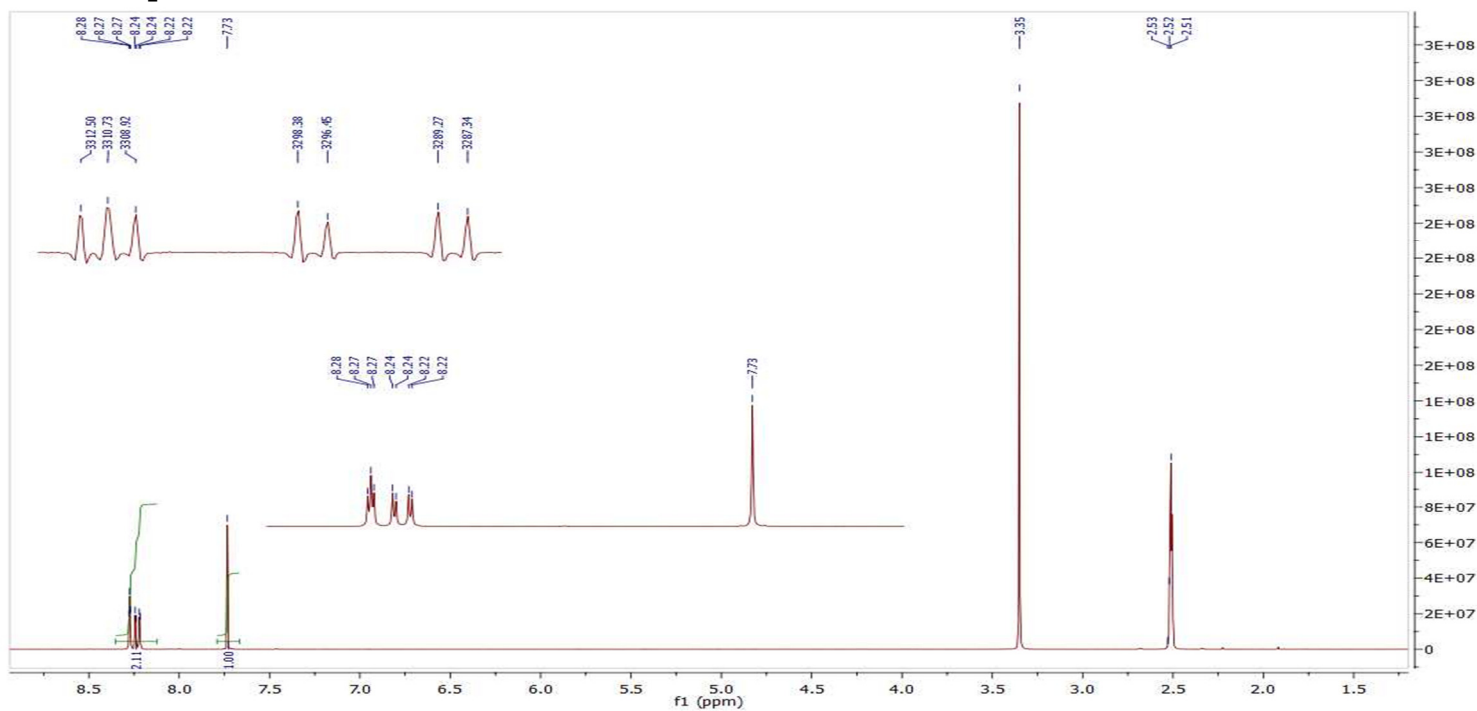

$^{13}\text{C}$ -NMR spectrum of 4c recorded at 125 MHz (DMSO)

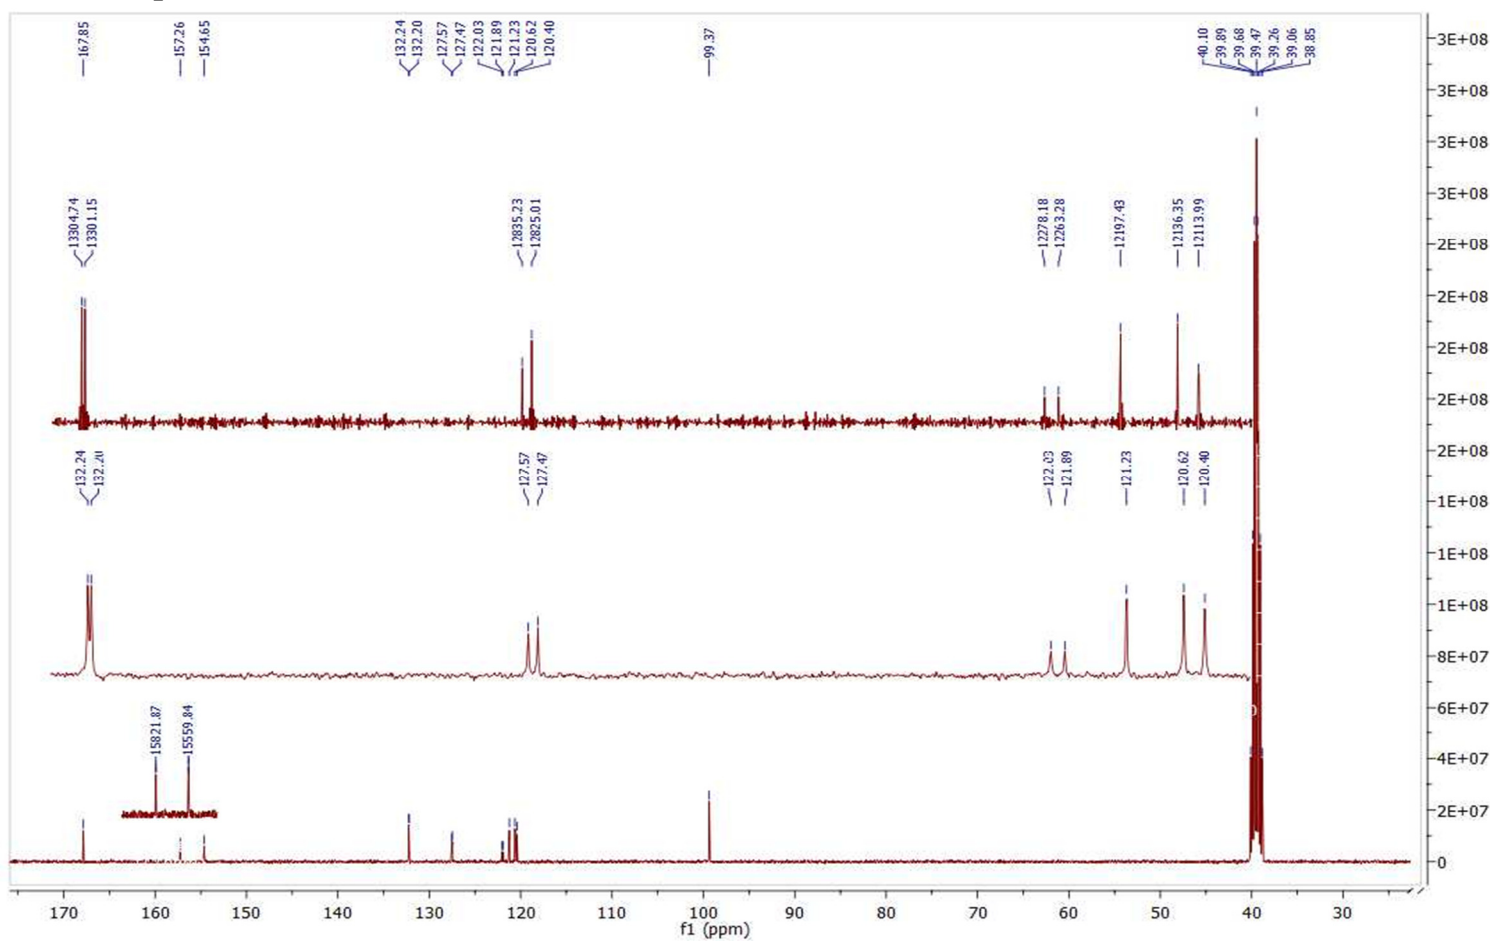

**<sup>1</sup>H-NMR spectrum of 5a recorded at 300 MHz**

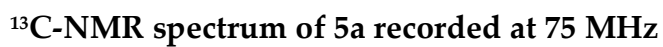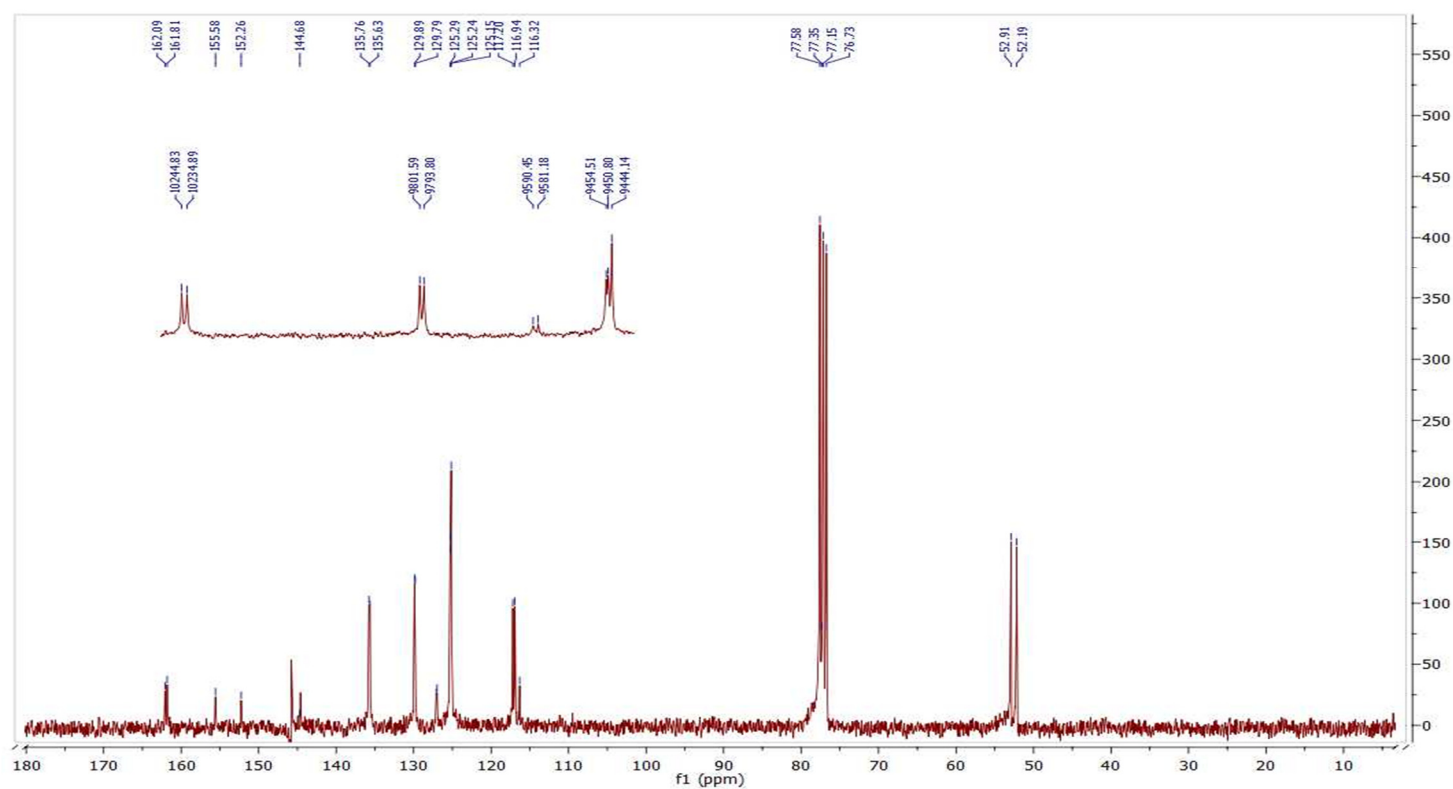



<sup>1</sup>H-NMR spectrum of 5b recorded at 300 MHz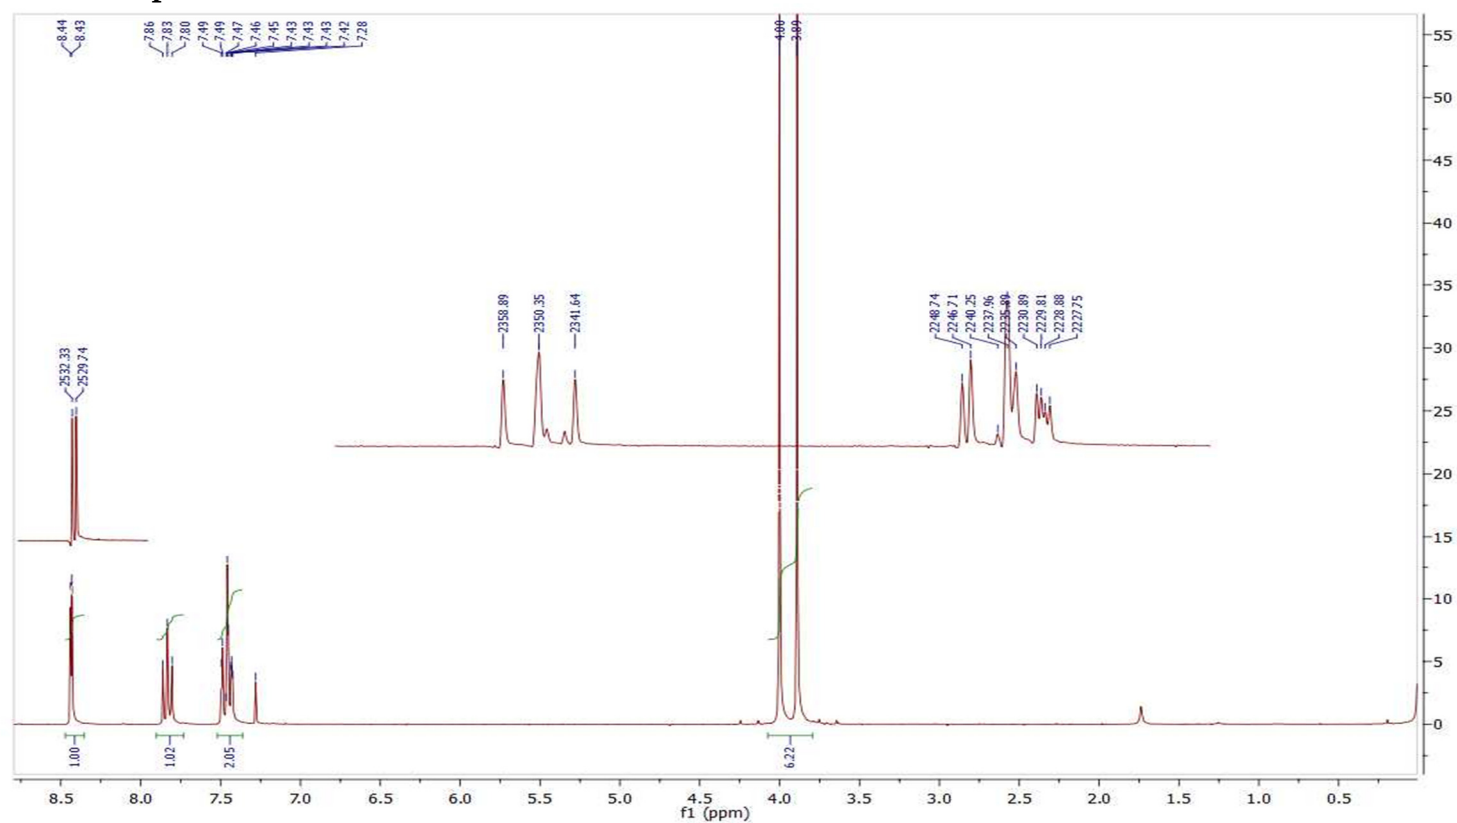

**$^{13}\text{C}$ -NMR spectrum of 5b recorded at 75 MHz**

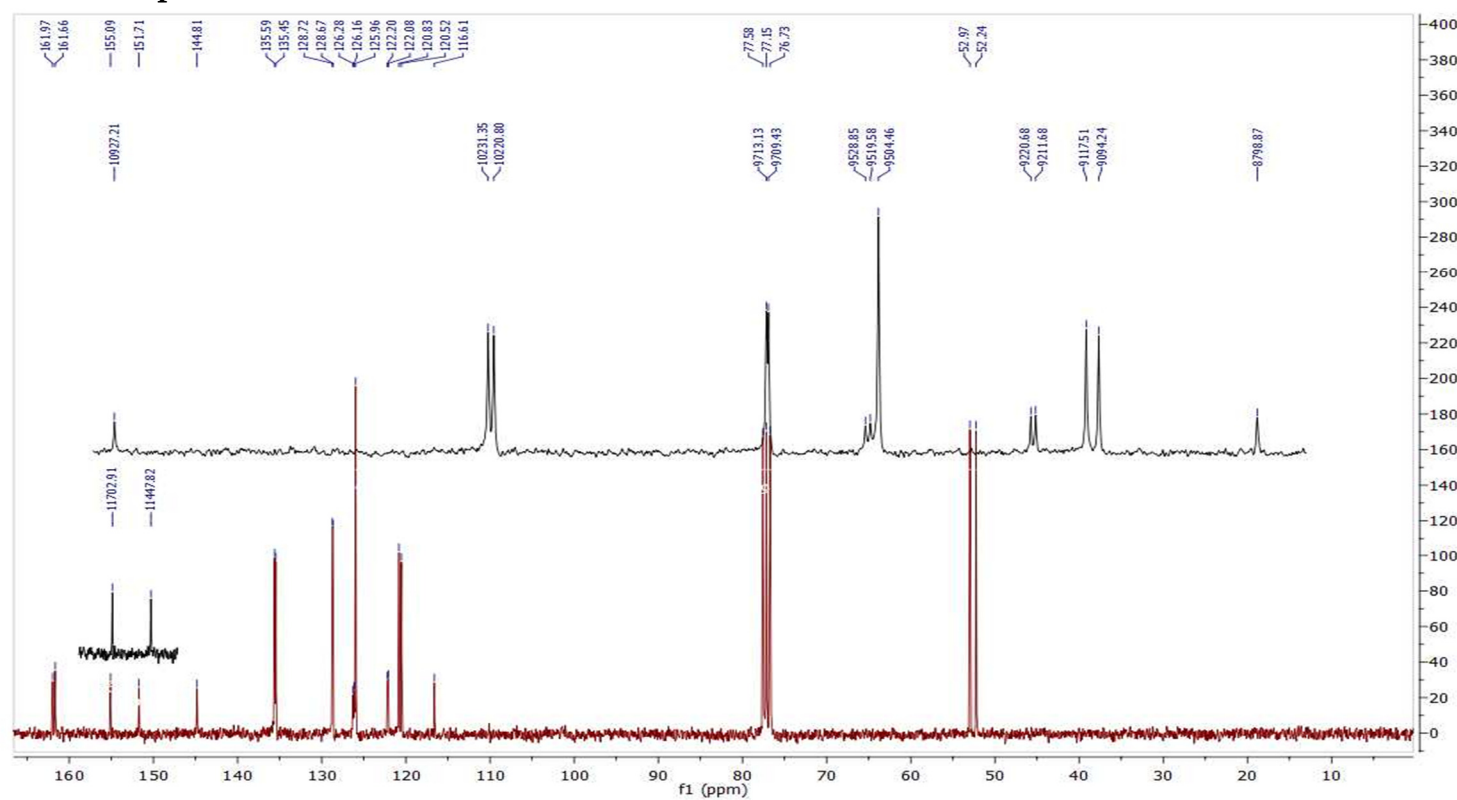

### $^1\text{H}$ - $^1\text{H}$ Correlated Spectroscopy (COSY) of 5b (aromatic protons)

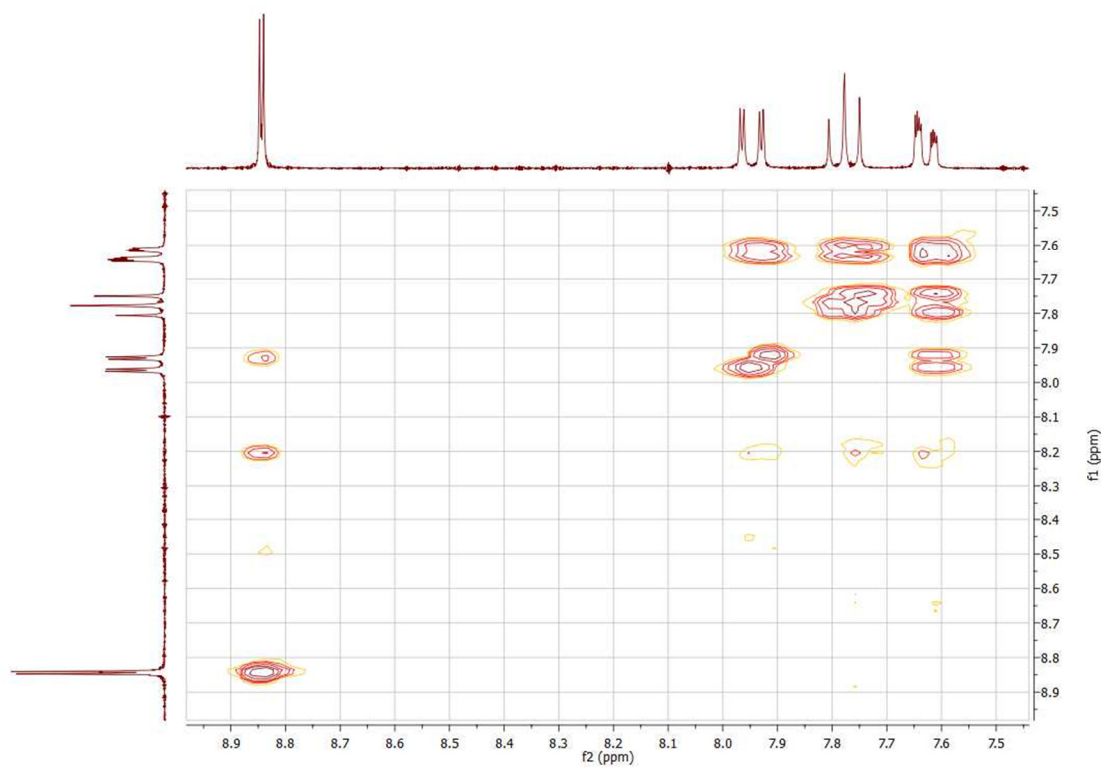

### $^1\text{H}$ - $^{13}\text{C}$ Heteronuclear Correlation spectrum (HETCOR) of 5b (aromatic area)

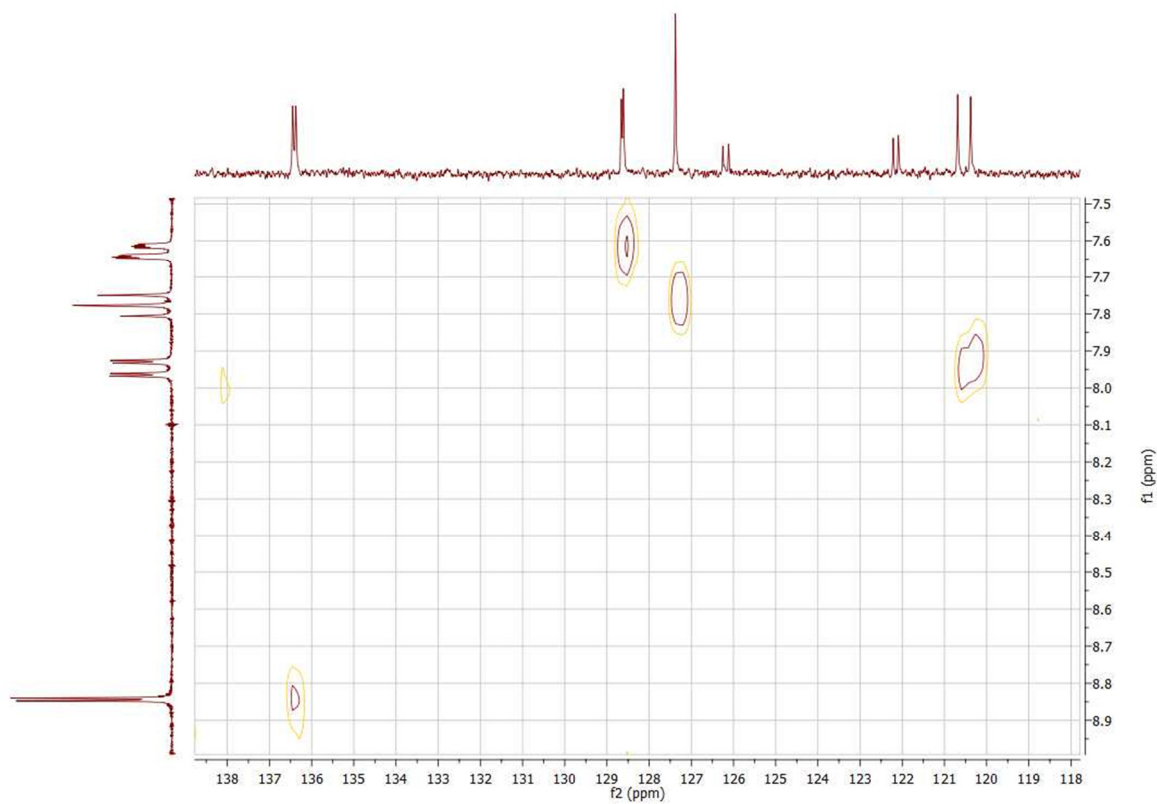

## Compound 5c

### $^1\text{H}$ -NMR spectrum of 5c recorded at 300 MHz

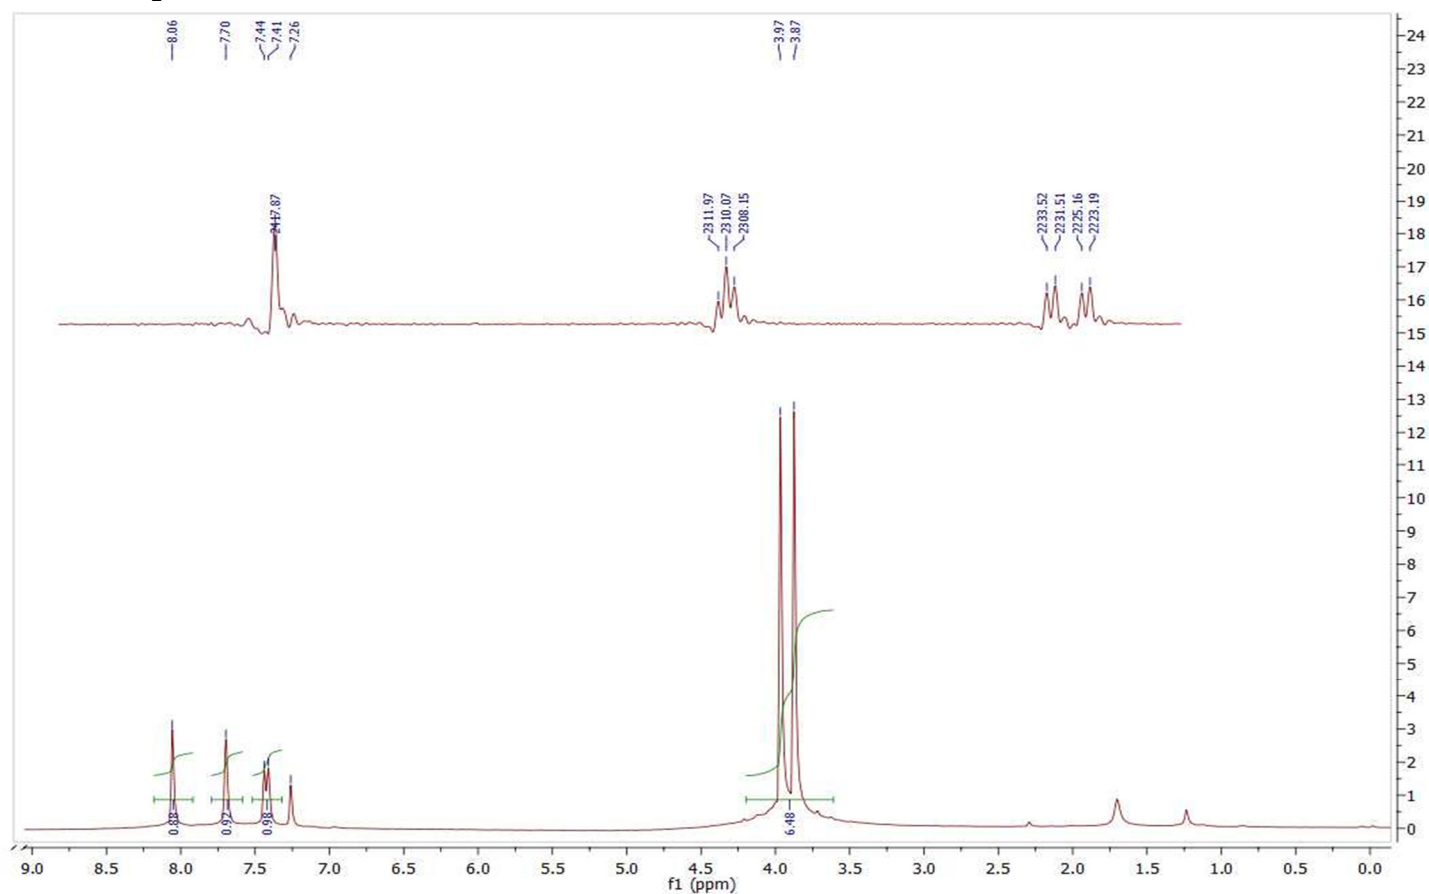

### $^{13}\text{C}$ -NMR spectrum of 5c recorded at 75 MHz

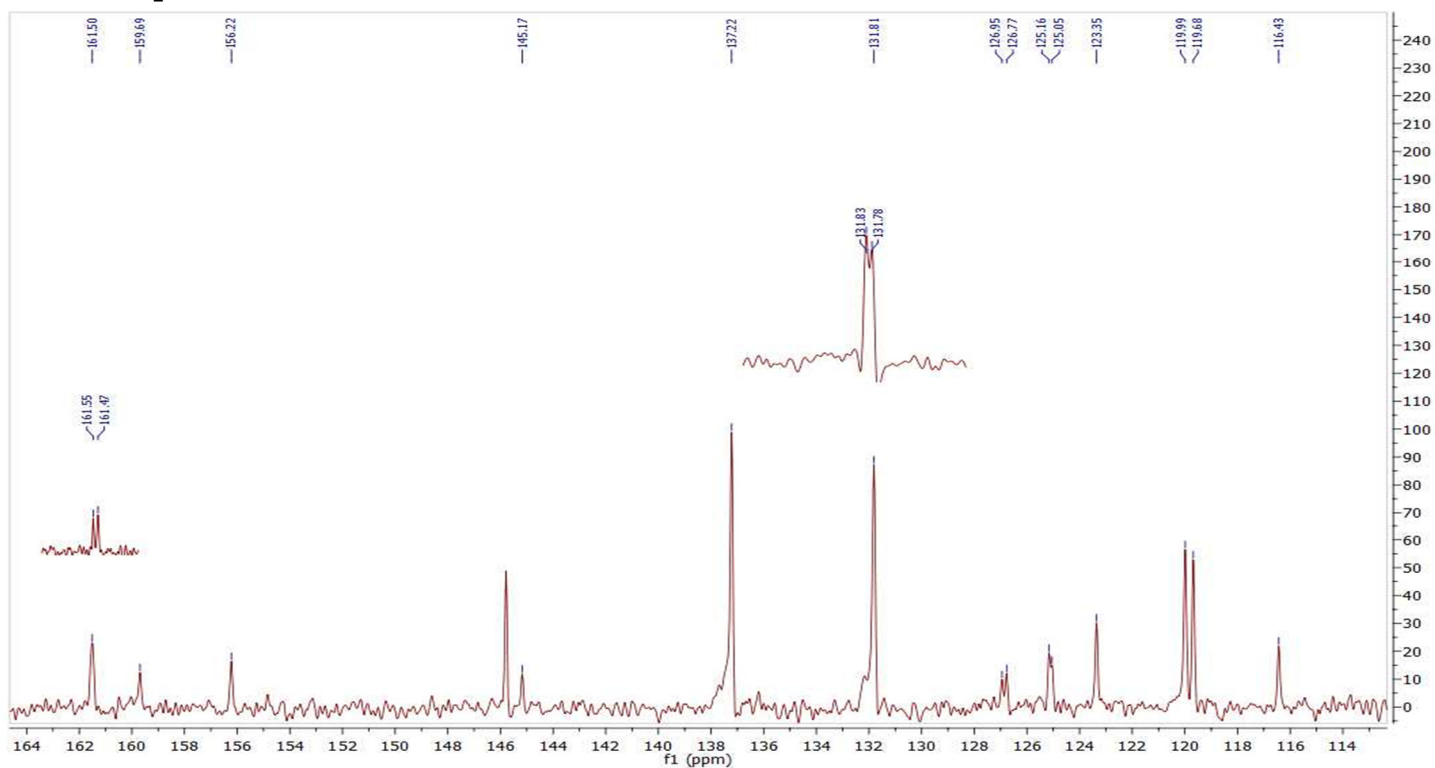

Supplement: s1 [file s1]
